# Supplementary material for: The Chromosome-Level Genome of Hestina assimilis (Lepidoptera: Nymphalidae) Reveals the Evolution of Saprophagy-Related Genes in Brush-Footed Butterflies
Source: MDPI journal article supplement (doi:10.3390/ijms24032087), 2023-01-20
Supplement: s1 [file s1]

## Supplementary Materials

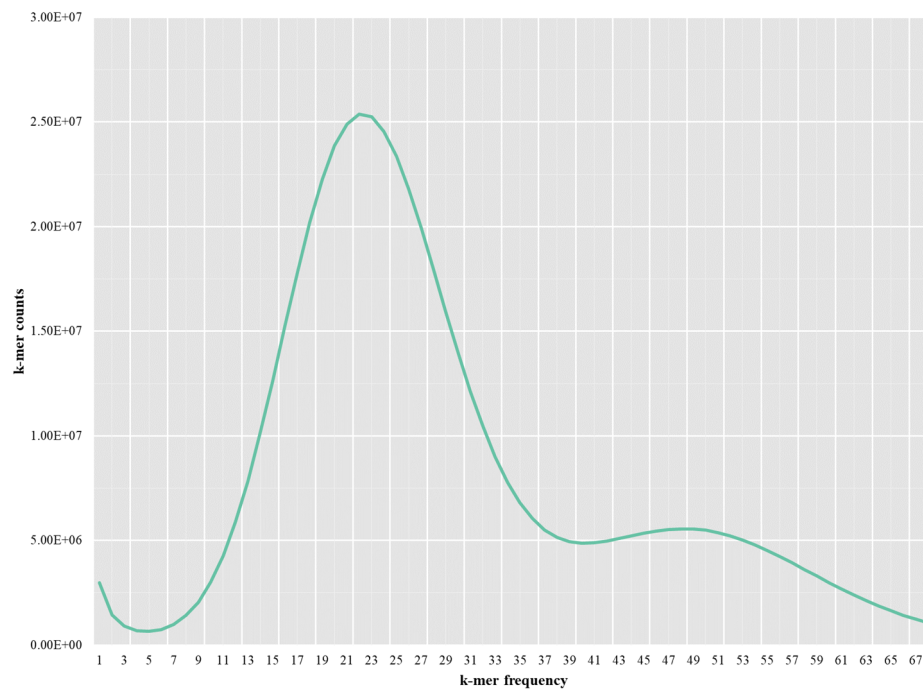

**Figure S1** The genome size estimated based on the k-mer analysis.

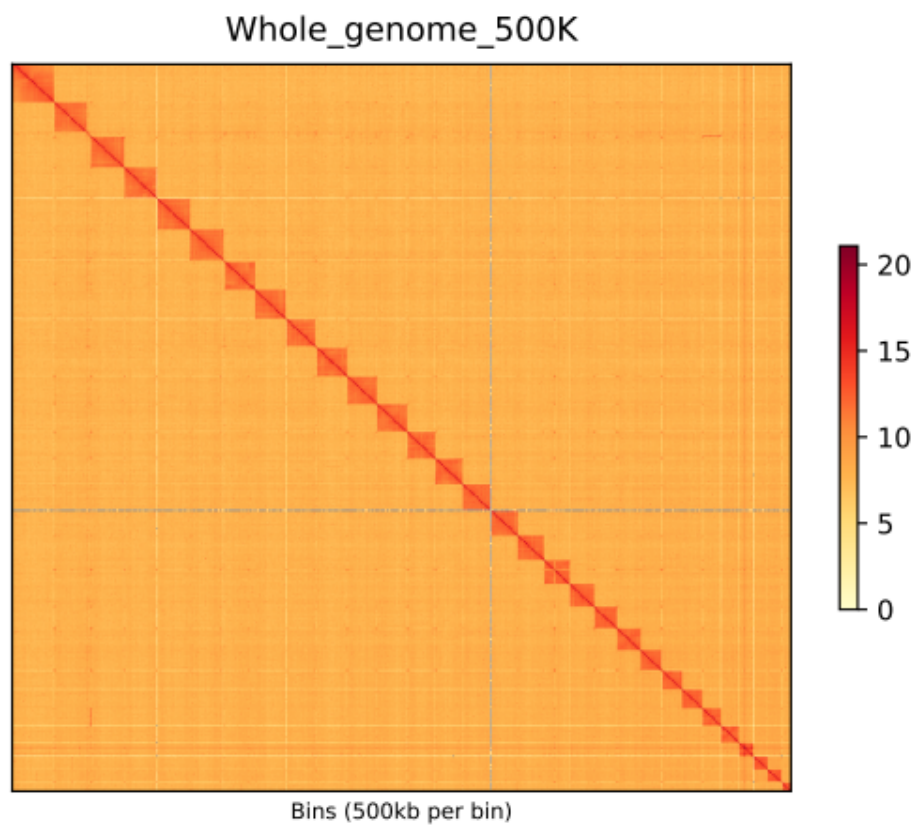

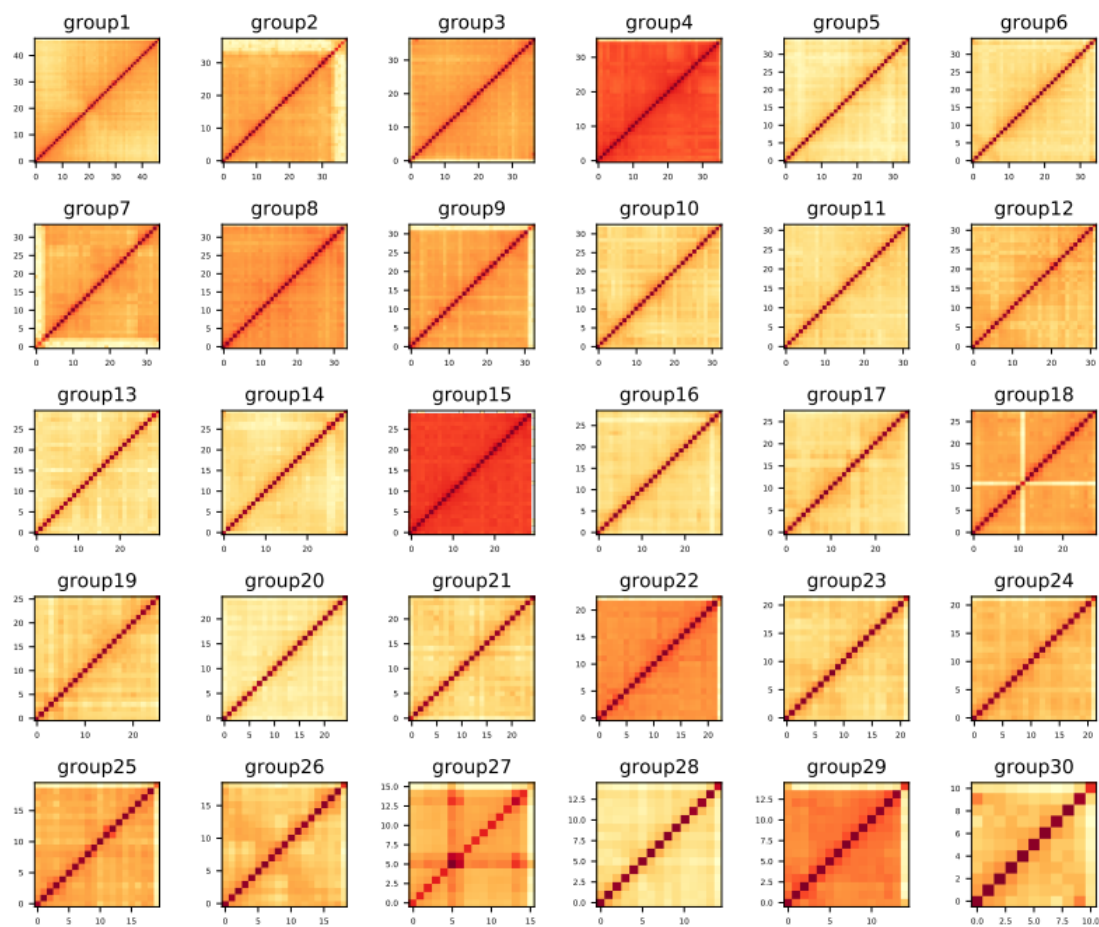

**Figure S2** The Hi-C chromatin interaction map of *H. assimilis*.

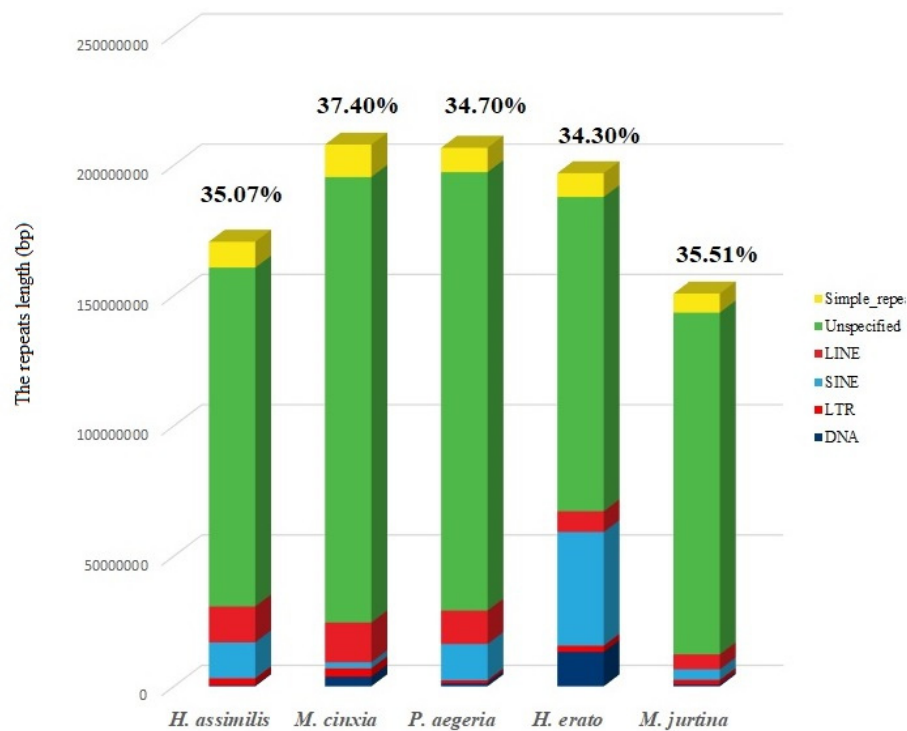

**Figure S3** Proportion of each repeat class in the genomes surveyed. Numbers above

the bar plot correspond to total repeat length percentage in each species. The repeats length ranges from 35.07% in the genomes of *H. assimilis* to 37.4% in the genome of *Melitaea cinxia* are shown.

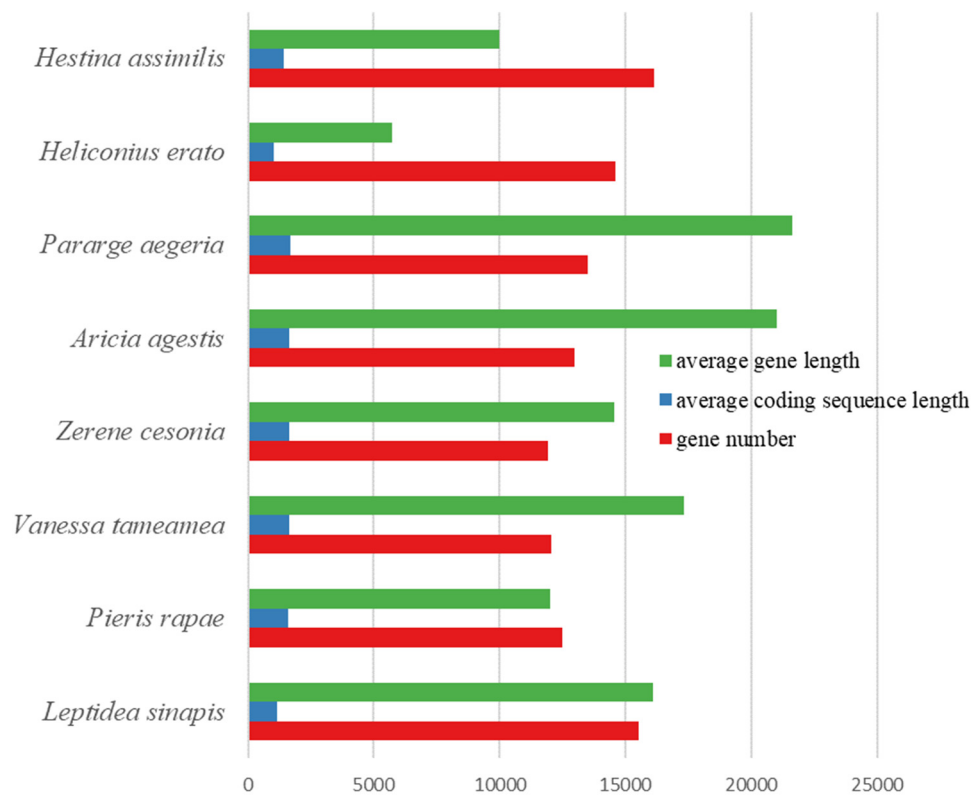

**Figure S4** The comparison of gene number, average coding sequence length, and average gene length with other lepidoptera species.

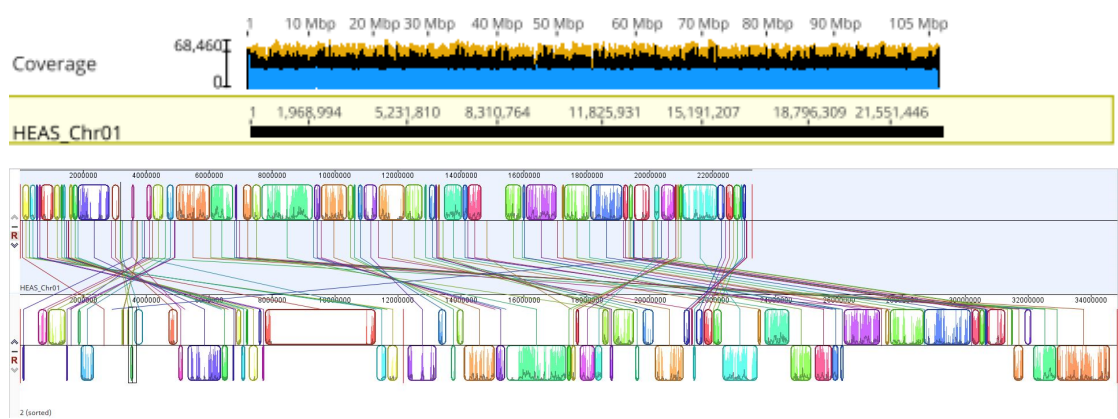

**Figure S5** Normalized male coverage along the length of chimeric scaffolds for chromosome 1 of *H. assimilis*. Coverages are plotted as sliding windows (width = 64 kbp, step = 10 kbp) of median base pair values.

**Table S8** Amino acid sequences of cytochrome P450 in *H. assimilis*.

### Cytochrome P450

>HaCYP1

MLLIIVILFLISIIYFYTTTRNYSYWSKRNVKYETPLPIFGNHLKVFLGLKSLAMIS  
NELYTKYSNEKVVGYFRGAAPPELLIRDPDIVRDIMSADFAYFYPRGIGRNMKN  
EPLLRNIIHSDGDLWKLLRQRLTPVFTTSKLKSMFPLIIKCTEKLKNLGEEIVCE  
GGECDAHDLMARFTTEFIGTCGFGIEMDVISKENSIFRILGKKIFERSLKDVLK  
FGVWDVFPIFRSMIRIMDEKLYKTISGIVMKIFEQRNFKPSGRNDFIDLLDLA  
GKGKIVGDSIEHVNPDGSPKEVEVKMDIDLLIPQVFMFFAAGFETSASITSYTL  
HELAFSADIQRKVQIEIDQVLSRYDDKLCYDALAEMTYFQMVLKESMRLHPA  
ACVLNRVCAKTYQISQLGITIDPGVRVVIIPVQALQNDKLYFESPDEFNPDRFIDE  
IDSRHKYVLLPYGEGPRACIGARMGQMMSLAGLAALLRKFSVEPSPKSRRLIQ  
MNPRQNVVQAALNGIPLKLLKLLKKAAARTASRNLTGGGAIEDLPELSHVEK  
RIITLMGGEGFATGDRHLQIQALEPIQEQUESPSILQPMLESSSTCSIQIYLYLTNPS  
ITTFSETLKFDDGNGEVSKTIYFYFTRNQNYWSVRNIKCDRPLPLFGNHLLNV  
LGIKSIATITTELYNKYPNEKVVGYIYGTQPQLIVRDPEIARDILNVDAHFHLR  
GLGRDHNKEPLLKNIFNADGDSWKLLRQRLTPAFTTAKLKGMFPLIVKCAEK  
LHGLGDEIVAKGGECDVRDLMARFSTEFIGACGLGIEMDTINNENSVFRKIGK  
EIFLRSLKDVFLLGVWDIFPEFRPMLHLFDKNLEKVLIEITKVFEQRNFKPSGR  
NDFVDLLDLAAKNKIKGDSIEKRNADGSPKEVELEMDTLCLIAQVFVFFAAG  
FETSSSSTSYTLHELAFEPDIQRDVQEEIDKVFAKYNNKLCYDAVAEMPLLERC  
FKESMRKFPPLGILNRVCANKYTISKIGVSIDPGVKIIPVQAIQNDDKYEKP  
QFKPERFGADDVTTTQKYIYLPFGEGPRACIGARLGLMQSLAGLAVILQKFSV  
EPSEKTTRKLLKINPRLNIVQGVMDGIPLKLNLRNK

>HaCYP2

MTLFVVRSYKNAYRKPVSNFPPGPPSLPIYGAYWILLFREFDNLAVSLYKLAK  
DYNTKILGIYLGIFPTIVINDSKLIKEGLNCENFDGRPDIIVGRLRSFWKRLGIF  
TDGYFWHVQRRFSLRYMRDYGFGRRDESLETVIANETKEMIDMALNGPKYP  
AEKELVKGDLIHMQHFFAVPFINGILHIFTRSTLPRSDYHILWEMARYTLMFQR  
GSNDLGGALSITPWLKDLLPNYSGYTNLKGNQKLLDFFGKLIKETIKTQEDS  
HDRHFLDCYIRKTKEEQKSTGRTTFAEDQLQLVCIDYMFPSATGTESMLTILIE  
RILLQPEVQDKIHEEIDRVVGRDRLPTLDDRQNMPYTEACLREIMRFETLVPLG  
VPHRTMKDTKFGGYDIPENTLVSFNYYSLHNDKEIWGDPENFRPERLIENGKL  
QLSKDKSLPFGAGKRLCAGETYARQAMFQVFAGFMQAFHVSTADGPPSLPIY  
GAYWVVLIREINNLAGSLYKLARDYNTKVLGMYLGTYPYPTIVIDDPKLIKEGLN  
CENFDGRLDIILGRLRSFWKRLGIFFTDGYFWHVQRRFSLRYMRDYGFGRRD  
ESLETVIANETKEMIDMALNGPKYPAEKELVKGDLIYLNFFAVPFINGILHIFT  
RSTLPRSEYHVLWDLARNTLMFQRGSNLGGALTITPWLKDVLNPSGYTNL  
CKGSQYLLDFFGKLINETTNSQEDSHDRHFLDCYIRKMKEEQKNGGRTTFTED  
QLRLVCIDYMFPSATGTESMLTILIERILLQPEVQDKIHEEIDRVVGRDRLPTLD  
DRQNMPYTEACLREIMRFETLVPLGVPHRAIRDTKFGGYDIPENTVVAFNYY  
LHHDKEIWGDPENFRPERFIENGKIQLSKDKSLPFGAGKRLCAGETFARQAMF  
QVFAGFMQAFHVSTADGEPMKKPARRIQGIITTLPEFWIRVTPRT

>HaCYP3

MRHSVCLRWPLRRFERSFGTTRHAAQASDGSIGNLSSRHTCPAHSRARSSHA  
VASVLETLSPTVKSWEVPGPKPLPLLGNWTRFIPYIGGYSVEHVDQVCLSLK

KQYGKCVKMAGLLGRPDMLFVFDASEVERVFRGEDAAPHRPSMPSLNYYKH  
TLRKDFFGAEKNCAGVIAVHGDSWAAFRTKVSRLSTGAAAQYTEQVGEVA  
DAFVTRIRDIRNSKLETPDDFLNEVHKWSLESGLIALDTRLGCFESCEGESQ  
RLIDAVHTFFLCVGELELRAPWWRIYPTTMFKRYVAALDTILSVTLSHVERAL  
QECQVNGNKSLLQDLVTAAGSRVAAVAALDMFLVGIDTTSNAVASTLYQLSLN  
PRVQEKLYKEITGVLQGRPLKAGDISQMPYKACIKEVLRMYPVVIGNGRQLT  
KDTIICGYNIPKGLLDGPDLLQSLPGIMYRFREGAVAVTADIKEMFLQIKVRPA  
DQPAQMFLWRGRDRENPPKRYKMTSLIFGASSSPFIAHSVRNKNQAQDFIHTHP  
AGYEAITRNHYMDDFVGSFADKEEARRTVDEVNYVQQQASFTLRGWDTNER  
GVLTNIPPELHSSLPTHLMGLDASRTLGLIWDSRRDELGFNTNMSRVHEEVK  
SLSRAPTKRETLSAVMSIYDPLGFLSPYTIVAKIILQSLWKTDVGWDDEIPQELA  
ERFHEWMQGLETIKTLRILRWYGVSKNDVRRELHIFCDASELAYAAVAYWRIE  
KSDGTVAIALAAGKAKTQVIFQHYVMGNSEYFSNASEFRPERWINRSTYKQ  
HPFASLPFGFGKRMCLGRRFAELEMHVICKMVQAFQMEYHHEPLEYHVHPM  
YTPNGPIRIKLLER

>HaCYP4

MKVGPKKIAFLINPEDVEILLICTKSNRKAYYYDFLRPWLSEGLLLSYGKEWH  
QRRKTLPAPHLNLRHFNSVLIERSNSLVKQLKTEINNSKTDMFSYLTDFSLNS  
ICETAMGTVLDEKESEIGKNYKNAIHKLCTYIYYRAHKIWLYPEFIFNLTRVGR  
DQKRLLQLIASFRNEVIEKRRKSNNYKTISTELMNEDLDDMFVYKKNRFAML  
DLLLEAESEGGIDPEGINEEVDTFIFAGYDTTATALQFVFLLLANHNDAQGYDT  
TATALQFAFLHLANHKDAQDKILEECNRILSSNDRKPTMNDFAQMKYLEACIK  
ETIRLYPPVHIMSRTCEQPLQFKNFKCPAGTEISIPVFM LHRRSDQFVDPLEFRP  
ERFLVEPTWHPFSYIPFSAGQRNCIGQKFAMLEMKL AISAVLA EYRLVPVTKPE  
DVLMSMDMGYDTTATALQFAFLHLANHKDAQDKIVEECNRILSSNDRKPTM  
NDLSQMKYLEACIKETVRLYPPVHIMSRTCDQPLQFKNFKCSAETE VVIPVFA  
LHRRSDQFVDPLEFRPERFLVEPTWHPFSYIPFSAGQRNCIGQKFAMLEMKLAI  
SAVLA EYRLVPVTKPEDVLMSMDMVLRTKDPIYVKFEKRNNKTT

>HaCYP5

MIIVIIISILCFYWIYWVAGTWRMDKATASLTPPSVPIIGNAMLFIGNTEKILK  
NLEDIAALAFEHKG VVKLWLGP KLYIAIGNPQDAQVVDNCLDKDVVYRFLQ  
PWLGGQLFIAPLALWKIHRKVLLPVFHNKIIEEYLANISKQANVLLERLFEQSG  
KPKFDILPYITACTLDIVFETAMGERMDVQHSPDTPYL RARHTVMTIMNKRLF  
KVWLQPDCVFNVTYPYAKQQYESIDFTHKFTDEVVRKKRTEFETRSTSKTDED  
KDRKPRAVLDM LFDREIKFTNTQLREHIDSITIAGNDTTALVIA YTLVLLGIHQD  
VQEKVLQE QIMIFGHVKKGATKEDLQKMNYLERVIKESMRLYTVVPIIARNID  
KEIHLPHSGVTIPAGVGAVVGAF AIHRSKEVWVPNANEFD PDRFLPENSVD RH  
PASFLPFSLSGRNCIGREQHWEEGDPVWVRDFRKGRKWMKGVILLRKGFNSY  
EVRTDDGLLWLRHTDQIRSCATRDSTPEGAANASERKPCVAPQAALTGRNFG  
MIIMKSISSVIRSYKIEADDIGPLKIEMLLPINGHQVKVTKR

>HaCYP6

MLLNNLRYLQPTTRKFVVKNGNGHIWYNIRRQTTKPLVINDDVTKSAEKYDK  
IDPISDITPVPRIVPMVLNNREPVLFPNDIPGPKSLKYFSMFRNSITEIGTQLTA  
GFLTFTGLANRRPIP NFSSLFDKYGPVVRVSPVGS DIVLINHPDHIQKVFSME

GEYPVRSTLESLERYRNEHKNHIFGGLYTGNGQDWVRQRSVVHSPVNNAVFQ  
HAQNVYHTCEKFTQKVYNIRNYQDEISKDLYKELHKWAFDCMGLILFSKDFK  
MLETELIYNQCDSSWMYNSLDKATDAIKCETGVHLWKFFTPAWYSLVKHC  
DILDSLIGHVLDIEQEISTNTQDDNATKAGSLTSAILLSEEKFAEDVATILMD  
MMLIGVNTITSSMAFLLYNIAKHQKCQRLLYKEVGNLYPDMIVKDVENFKGN  
TPYLQACIKETFRLVPPILITRILSRNITLDNYNIPRGTLIIMSTQDASLKEGNY  
DDAKKFRPERWLKPEAQEYHAFASIPFGFGARKCVGQNISETMLSLLTIKVLQ  
KYRLEYHYGDVQPSRGFITRPNRPLKIRFIDRM

>HaCYP7

MAEELAAVVGKGNVSLEKYINSYSLDTSCDTTMGDSVKSQRQLEHPFLVAFT  
KYTENLMDRMCKPWLHIGAVYKRQAVYSKQVEYKKTIVDFVEKNIAKTRLL  
NEENKHDEGESCDSMEEEGSKRIKTFLELLTEHSGYNDLELREETLILILAATE  
TTALTSGFTGVLLARHPDIQEKVYEEIREVFENSRRPLSIDDLNNLKYLDAVIKE  
TMRLYPPGPALMRTCDSTVTLPSGLVLPKGSNVIVNIWAIHRNPRYWGADE  
FKPERFLNASREQLAAYMPFSSGPRSCLVISEPEAANFILKSCLDKGRLTSFARH  
LFGNGSIFASASTINANIQSFLESLTEHSGYNDVELREEALILLLAATETTALSSG  
YTCVLLAHHADVQDRVYQEIYEVFGDSSRHICSDDLNNLKYLDAVVRESRL  
YPPAPILARGCHSDVRLPSGIVLPKGTNTIINTWAIHRNPHYWGEDADEFKPER  
FINVQREQLAAFLPFSSGPRNCLGYHYAMLTMTKNLATLLRRYRIVPATSFKY  
DDQNPLRVKFSVTMKHVHEYEVQLEHRLRH

>HaCYP8

MTVVEDIHPLYTLNTRLMFYPLVLLATTLWLLYRWQQSRLYKLGNKIPGPSA  
VPLFGNALLALGKRPEQLLSLALQYADKYGTVVVRGWLGTKLIIFLSDPDDVE  
VILNSHVHIDKASEYRFFKPWLGEGLLISSGEKWRSHRKMIAPTFHINILKSFV  
GLFNQNSKNVVDKMKGEVGKEFDVHDYMSGVTVDILLETAMGITKDTQGN  
DGFDYAMAVMMKCEILHHRHYKFWLRFDFVFKFTAFFEKQKLLGIIHGLTN  
KVIKNKKEYMLNKSCKGIIPPTLEEEIRASSENETGLANVKTLADTVFKGYR  
DDLDFNDENDVGVKKRLAFLDLMIESAQNGTNKITDHEIKEEVDTIMFEGHD  
TTAAGSSFVLCLLGVHQDIQTKVYDELYSIFGDSDRPCTFEDTL SMKYL E RVIL  
ETLRMYPPVPIIARKLKRDKIATNNYVLPAGSTVVIGQFQVHRNPKYYSNP  
VFNPDNFLPENTQNRHYYSYIPFSAGPRSCVGRKYAILKLLKILLSTILRNYKMV  
TNITEDQYVLQADIILKRNDGFRVRIEPRKRPSTV

>HaCYP9

MGGGDRLTPVLHLLYNIYGWVLRLNIIMILFIWCAVLVSVLLLYCRKTYSRFSK  
HGKNEKVVPLFGNMLNAVLRQEHFNEGFNRLYNDFPEERFVGRFEFTKPSIV  
LRDLDLIKKITVKDFEYFLDHRGLVDETNEPLFARNLFSKLGQEWKDMRSTLS  
PAFTSSKIKLMVPFMEEVGDQMIATLKAKIKDSDTGSIELDCKDLTARYANDVI  
ATCAFGKLVNSHTDVDNHFYKMGTTVSNFKFRQLILFFAMAACPSVIKVLKL  
KLFEKNFNDFIDLVLNTMKDRKTRNIIRPDMIHLLMEARKGQLTHDKKSVNG  
HQDTEFAAVEESSIGKKHTDRVWSDVDLIAQAVLFFIAGFETISTAMS FALHEIA  
LHPEIQRRLVKEIKDHHAKNGEKMDFNSIQNMTYLD MVTSEVLRLWSPALAL  
ERTCKKDYNMGKPN SKATEDFIIKKGETVWIPTWGIHRDPKYFPNPEKFDPER  
FSDENKHQINTMAYMPFGLGPRNCIGSRFALCELKVLLYQVLLHLEVSPSKKT  
CLTGKLTSTKSFNPRLEGGHWNFKIRE

>HaCYP10

MVIRLLVMIITKKKKAISFYEQFSVTLSGLLFPPVRQEENRSDGRERENNGTEL  
SVFFLECFRMFLLTIVSVVLCFVLWIYIRWLRYKRYWADRGVPHLPPVPILGSL  
TFLQRENMNKWFRGMKEQFDSPYVGIWVFWRPGLIVNSPEIARNILVKDFDN  
FRNRLLGSGESDPIGSLNIFTSNDHVWTSMMRQLTGIFTAAKLRLNLQRFTRSKA  
EELIQRIKNDQNIKIDLKCICTDYTTDVIGTAAFGVRSNATLTGGGPLRDVTNSF  
SKYSIYRGISWCSIFFFPELVDIFRFTFFPSSSTKYFKKIYHTVTLQREVNQNDTE  
PRDLVDTLCLKIKRDNKSYSEEMIIAQAAILLGGYETSATLMTFIIYELAFNHDI  
QEKLYQELVEARDKNGSDEFDIQVLTDLTYLDCVIKEGLRKYTTMGWLDRVA  
TNDYKIDDKLTIEAGTVVYINSIGMHYDPKYFPEPDKFIPERFLPENKNNIQPFT  
YMPFGEGPRFCIGKRFGMLTLRFALTLLLLNFNIRPFDPSPKPSDIKFNTIGIFLA  
PGETLYVDFVPRKE

>HaCYP11

MGYAATESVAVSNTWAATNLFYVLLVPAILLWYAYWRMSRRHLYELAEKIAG  
PKGLPLIGNALEFTGGSPDIFRRVVERGNEYNKENAVKIWIGPRLVFLFDPRD  
VEVILGSHVHIDKAEDYRFFKPWLGDGLLISTGQKWRSHRKLIAPTFHLNVLK  
SFIDLFNANSRAVVNKLKKESGVFDCHDYMSECTVEILLETAMGVSKSTQDQS  
GFEYAMAVMKMCDILHLRHTKIWLRLPDLLFNFTQYAKIQNKLLDVIHGLTKK  
VIIRKKEEFKSGKKPSIVETETSDKESLSSKVTSVEGLSFGQSSGLKDDLDVDD  
DVGQKKRLAFLDLLLESAQGGVNISDEEIKEQVDTIMFEGHDTTAAGSSFFLS  
LMGIHQDIQNKVVEELDQIFGDSDRPATFQDTLEMKYLERCLMETLRMFPPVP  
IIARHLKQDVTMPNSGKKIPAGTTVVIATYKLHRREDVYPNPEKFDPDNFLPER  
SANRHYAYAFVPFSAGPRSCVGRKYAMLKCLKIILSTILRNFRVHSDLKESDFQLQ  
ADIILKRAEGFKVRLEPRKRATKA

>HaCYP12

MKAHITWISSQAARVKSIPKINMIILLIWVFLVAALLLYFRQIYSRFSKYGVK  
HFKVVPVFGNMLGIVFRRETMSDEMDSYNTFSDERFYGRYEFITPMLVIRDL  
ELIKKITIKDFEHFLDHRGLTDETVEPLFARNLFSCLKGQEWKDMRSTLSPAFTS  
SKIKLMVPFMEEIGEQMIRALKKKIKESENGSMNVDCDLTTRYANDVIASCA  
FGLKVDSFTEENKFYEMGKTASTFKFKQLLAFFAVSACPAIAKRLKLKLFNS  
QTRDFFIDLVLTTMKDREARNILRPDMIHLLMEAKKGQLSHDDKNETHQDTG  
FATVEESSLGKKSIDRVWSDNDLIAQAVLFFVAGFETISTAMSFALHELALHPD  
VQDRLVEEIKENHIKNGGKLNFFSIQSMTYLDMVTSEVLRLWPPGIALDRICI  
KDYNIGKPNKSTEDYIVSKKGEIISIPAWSFHHDPKFFPDPTKFDPERFSDENK  
HKINPTAYMPFGLGPRNCIGSRFALCELKVLLYQIILYMEISPSEKTRLPAKLSTE  
SFNPRLEGHWLKFVVRD

>HaCYP13

MRTKALVCSGARQQVQGATPDQYEPAPRRAAARRRPSFPDPGRPQSTQTTIYT  
SRSNIMRLLIFVLRKLERERWGITMVNTRDLLAIDGAGGAAKVAKLFGHPDLV  
FPFCAEESAKIYRREDSMPHRAAAPCLKHYKQELRKDFFGDEPGLIGVHGMP  
WSKFRSKVSKALVAPEAAKAMVPALDDVAIDFVNRMEQILNHNRELPMDFLT  
ELYKWALESVGAWALGTRLKCLSDDEDTEAREIISIHGFFHSVPELELSAPLWR  
LYSTVAYKTYVEALDSFRILCLKRLTDKGVCAKIAQSSGEKVATILGLDLLLVG  
VDTTAAAAASTIYLLAKNSRAQRRLQEELDNRLPVGKTLNSKDLDQLSYLRA

CIKEALRIKPVILGNRCIQSDAIISGYEVPKGSHIVFPHYIMSNEERYFPNPHEY  
VPERWLRDKEHNTNGSSPTTDNNSNKTICEHAKAMEISEKQRMMGIHPFASLP  
FGFGRRMCIGKRFAEVELQLLLAKVFHRYNVSWRYGDLTYSVTPTYVPNEPL  
RFKMDVRKSEN

>HaCYP14

MITMLSNSKLLWGLWQVVSYSRTTMPLLLIVGMTFLAMRLINLVREIRKLP  
PGPWSLPVVGYPFLGVRHKTFLLEARNYGALFSARLGNQLTVVLSDYKLIRE  
AFRREEFTGRPTTPLMNILDGLGIINSEGRWLKSRRLHEKLREFGMTYMGN  
GKKIMEARIKNEVHELIANLQCTEGAPIDANPLLALGVSNNVICGITMSVRFSGH  
DVRFARLNHLIEEGMRLFGIEHYGEYIPLYNYLPGKALIQEKVAKNREEMFAF  
YQTLIDEHRNTLDINNARDLIDVYLIEIEKAKIEGKEGELFEGRDNELQLKQIL  
GDLFSAGMETIKSSLLWMIVFMLRNPDKRRVQEELDSVIGRERLPTIEDMPN  
LPYTETTILETLRMSSIVPLATTHSPTKDVHLNGYRIPAGSQVVPLINCVHMDP  
NLWQEPNKFNPFRIDESGKIKRPEFFMPFGVGRRMCLGDVLARMEMFMFFS  
SMMHQFDVQMEADVAPPSLEGTVGATIAPQNFRVKFITRAPPAPPVILHDHP  
HLRHVGAH

>HaCYP15

MSALLIIALCVFIIKYVTKRTVITYRRANKYGENKIQELQPAPGPIPLPVIGSMH  
LLGRNESPFQTFTELAGVYGDVYSLKLGTSQCLVVNSLDRIEVLNQNKGKFFG  
GRPDFLRFHKLFAAGDRNNSLALCDWSNLQLRRRNLAARRHCGPKQHTDNFSRI  
GTVATFESVELIQNLKNITSSTTNSINIKPILMSTAMNMFTNYMCNVRFDADTD  
VEFKKIVDHFDEIFWEINQGYAVDFLPWLAPFYKKHMEKLFNWSQDIRSFILS  
RIVEQRETNDMDGPEKDFLDGLLRVLHDDPTVDRNTIIFMLEDFLGGHSSV  
GNLVMLCLAAAARDPEVAKNIKSEIDNLTQRKRAVTLADRSSLPYTEATVLEC  
LRYASSPIVPHVATENANIAGYGVEKGTVVFINNYELNTSSKYWDEPEKFDPSR  
FLEKTKVKTRNSLCDSGMESDSEKSGQGLNQDEEVEIEVSVKKNIPHFLPF  
SIGKRTCIGQTLVTTMSFVMFANIMQEFDVAAVDKNDLRQKPACVALPKDITYH  
LYLLPRK

>HaCYP16

MDFFFVWLVTFLGYWIFKKINEWKNLPPGPWGLPIVGYLPFLDRQQPHLTLT  
KLSQQYGPIYGLGMGSIYAVVLSDHRLIREAFKDVFSGRAPLYLTHGIMKGN  
GIICAEGALWKDQRKLITSWLKSFGMSKHGVARDKLEKRIASGVHELIENTE  
TSGSSLDLSNMITHSFGNVINDIIFGFKYPSHDKTWHWFRQIQEEGCEMGVA  
GVVNFLPFVRFIYPSVQKTMEVLVRGQSQTHRLYASIIARRRKMLGLTPKDA  
VYAEHADLFNEHPEGFIKCVTYSKHVSITESHYFDPSVLIASEDECILDNFLNE  
QKKRYENGEEGAKYMTDEQLHYLLADMFGAGLDTTSTTSLWYLLYIALYQD  
EQEQVRQEILSVYPEDCQPDCKSLPYLMATVCETQRIRSIVPVGIPHGCLQDITY  
LGNYRIPQGTMOVVPLQWAIHMDSNIWEDPNEFKPNRWIDECGNLLKPQEFIPF  
QTGKRMCPGDEL SRMVSVGVITRLLRSFRIRLAGKPPTAEEMQGKVGVTLSA  
PETLFICETL

>HaCYP17

MHVQQDPDDRITFENVYPVQTLTQHRLRRRGRGPLFRTSRRRAHTVGSAMLL  
AYLILSCVLFGVLLFFQQRNRNEPPLLSRALPIIGHAHLLAGSTADLWNFLKE  
LILECVKRGGLTTFRLGPITLYALTDPDFFLTVANACLQKDNIYDFAKPWLGE

LITGTLPVWKVHRKLLNPAFNQIVLDGFLDVFNKQARRLVNEFEIEVDKKSFD  
HHTYIRNKSLETICLTALGVDLNEKSELNTQYINAVDQLFKIFMERTQKFWLHS  
DLIFNWSVHKGRQDEFVKNFHNMSHTVLQKTRENYKNNKEEKGPKFKA  
QLLLELTIEKDLLKDNEIREEVDTMIAAGYETSATSLTFCMLMIGSYPEVQEKV  
VKELKEVLGDDDRDLTKQDFSNLIYLDVAVIKETLRFYPVAPVVARYLDKDIKL  
RDYTLYKGARCFMFIYGVHHSSIWGSDAEEFKPQRWLDASLPKSPA  
AFVGFSGRRNCIGKAYALMFLKTSLAHVLRKYKLQGDHTKLELDLDIVLRPVSGHHI  
SIQRRK

>HaCYP18

MIILVIWGTVLLAVLVPYLYQTYSKFSNQGVKNLKVFPFFGNKFKMFFRIETLA  
DELDRNYETFPEERFVGRYDFTKPVVLVRDIDLKVKITVKHFEHFLDHRNFVD  
EKMEPFFARNLLMLKGQEWKDMRSTLSPAFTSSKIKLMVPFMEEVGQQMTQ  
ALKKRIRESKTGHIDVDCKDLTRYANDVIASCAFGKVDSTDEKNKFYEM  
GKTVTNFNFKQILYLFTILASPALARNLKLTIKSDTKQFYMNVLVNTMKDRET  
RNIIRPDMIHLLMEAKKGQLSHEDKEDNENYQDTGFSTVEESSIGKKTNAKV  
WSDNDLTAQAVLFLIAGFETVSTATSFALHELAINPEIQERLVHEIKEHDVKNG  
GKLKFSITQSMTYLDMVISEILRLWPPGLGLDRMCVKDYNMGKPNKSTKDY  
IIRKGELISIPVWCFFHRDPNYFPDPMKFDPERFSEQNKHTINPAAYLPFGSGPRN  
CIGSRFALCELKVLQYLLHFEVSPSEKTHLPAKLSTESFNPRLKGGHWLKFNI  
RE

>HaCYP19

MSKAVLARQCCLSRPSRRQISTSSVRRTSTSPQRRNVAAAAIYNKYKFS  
DIPGPMALPIMKHHAHVMMIQRVTKALFPGSFHHTVGLGLLEGLRERYGDLVRLA  
KGSRSRPVLYVFDPELMREVEYESNMTEPPQWMRSPLEEQKRNAGTQCPMQR  
DETEAVWAGIRTLLKDGAIRNYDKAFDDIAADMTRRLGELRHAENALNEEF  
ETEVYRWAIETIGVMLFGIRLGCLDGAVHIPSEENRRPEKTSMDDHIDLC  
SLSTRCLTELNPAEQFVRCSLEIANESYLVRSEHTLRPDLTDDFLLKALHEL  
NNDEL RPEQTLDDKLRLPLDRRILPLAADMFLAGVEPLAQTAVSMFYQLSL  
HAARQQR AHDEVVWAKASRDEGLDIQELPYIASCAKEAMRLYPATGGV  
VRRSREELVVG GYEVPA  
GVDIVLAHGVTSKLEEQWGRAKS  
FIPERWCSQAW  
EPLKASRAH  
SVA SMPFGQTC  
PATGIVNKML  
STLATKIVE  
KYRLEWHGPN  
PNLVTTGVN  
KIQPPYY  
FVLQNAS

>HaCYP20

MGRSLNSLKPYTRPFTIKNSRQATTGCPFSKRQRSQIAPAASLNEE  
IFGNAKPY SAVPGPKPIPLGNTWRMVPVIGQFDISEFAKVTKSFLDKYGRIVRLGGLIGRPD  
LLFVYDADEIERMYRREGPTPFRPAMPCLVKYKSEVRKDFFGDLPGVVG  
VHG EQWRRFRSKVQRPILQPQT  
VKKYVTPIELVTEDFIRY  
MENARDENGDL  
PHEFD NDIHRWSLE  
CIGRVALDVRLGCLSPNVTSD  
SEPQRIIDAAKYALRN  
VAVLELKA PYWRYFPTPLWTKYV  
NNMNFFVELCSRYINEAL  
ERLKT  
KKVTS  
ENDLSLLER VLQSE  
GDPKIATIMALDLILVGIDTISMAVCSILYQAATRLKQQDKMA  
EEIRRVLPDPSKPLTYADLDKLHYTKAFVRE  
VFRMYSTVIGNGR  
TLQEDDVICGYHIPKG  
VQVVFP  
TIVTGNMEQFVS  
NPPEEFRPERWLENDGRLHSFASLPYGF  
GARICLGR RFADLEIQVLLAKLLRRYRLEYHHEP  
LEYAVTFMYAPDGPLRLRMVERSS

>HaCYP21

MIYIIWVFILIAVLAVYFRQTYSHFSKYGVKNMAAVPFFGNMLRIVLQINHFGD  
EMDRMYKKFKGERFVGRYEFVRPILVVQDLELVKKITIKDFEHFLDHRTFTDE  
KNEPMFARNLFSLKGEWKDMRSTLSPAFTSSKIKAMVPMEEVGEQMIRAL  
KKKLKESDSGGIDVDVKDLTTRYANDVIASCAFGKVDSDHTDENNQFYEMGR  
IASTFNFRQMLILFLISAFPSITHILKLKVFSDSTKSFFVDLVTGTMKDRRTHHII  
RPDMIHLLMEAKKGKLSHDEKSDTQDAGFATVEESSVGKKTVDRVWSDMDL  
IAQAVLFFIAGFDTVSTAMSFVLHELAIHPEVQERLAQEIKEQDVKNNGGKLDL  
NSIQNMTYLDMVTSEALRFWPPAMALDRICVKDYNLGRPNKATKDYIIRKG  
DVISIPVWSFHRDPEFFANPNKFDPERFSEENKHNNPMAYMPFGIGPRNCIGS  
RFALCELKVLLYQILLHIEVSPSKKTLLPAKLSPDTFNPRLYGHHWLKFKSRS  
>HaCYP22

MIVEIIIFVITSIFYVFLYLYKWVHKFFDDRGIKYVPGVPIFGNVVKSTFLKNHV  
VEDIDRVYKAFFGERYVGYIEGPSIFLVRDPELIKTITVKDFDHFVDHKQFFSE  
EIEPLFGGSLIMMRGEKWHDMRTTSLSPAFTGSKMRKIMPFMTEISSNVIEYLR  
DHVNEDIDIDDLMRRYTNDVIASTAFGLQVNSVKDKNNEFYMLGQNLFKFNF  
FQRMFFITTLCPNLCKKLGIIQIFPAKTTQFFRNIVTSTMEYREKNKIERPDMIQ  
LLMEAFKGSCLKADNEGNDNNILAEDTFKPKAVQRQWTQNELAGQVFIFFVAG  
FESSATSLVMAVHELALNPHVQDKLYQEIIKFKEEHGDDVTYDNINSLKYLDLDCVI  
NETSRKWAAALIMDRVCNKAYELPPPRKGAKPVQLKPGDVIYNVNSIHMDP  
EHHPEPEKFDPERFSDENKHKIKPFTFMPFGMGPICIGSRFALLEIKILLYNLVL  
NYKVVKCSKTTDPIELKPHAFTIQPKGGCWVRLEPRI

>HaCYP23

MVIYPIITLIFGVFIYIYFLTRYNDYWKKRNVAYLKPSLLFGNYKEYILFRKCR  
QKIAHEICQQFPNEPYVGTIFYGTDPALIHKDPNLVKLVMAKDFYYFNHREVSQ  
YTHKELLTQNMFFNGGDTWKIFRQNLTSLFSSAKIKNMFYLIESCAGCLENVI  
NKEKTEDNIIKAVLARYTMDCIGNCAFGVNTGTLETNSPSNVFTVMGIKLF  
VSNYGGFRLYARSMWPNIIFYTLGFTMFESDIHSFFTKLMTEVFESRQYDESSR  
NDFVDLLMSWKKKNCITGDTIMSLKTGDKTTISLNVNKLKLLISQCVLFFAAGF  
ETTATTTSLFLYELSKNKAQARVIEEIDDYFKRHEGKIEYECINEMPFVQACID  
ETRLRYPVLGLLTREVIEEYTLPTGLRLEKNSRVHIPVHHLHHNPEHFPEPEEFR  
PERFYGDERKNVKQYTYMPFGEGPRICIGLRFKMPMYAALLTIFKNYSVDLA  
KGMPLTVDIQPRALVAQSTCDMNIKLIPRRT

>HaCYP24

MIAYYPIFTAIAAVLYFLYYNVVKYNDYWKKRNVPHLKPSLLFGNYKEYILFQ  
KCLPKVARDVCRKFPNEPYVGVYYGTDPALIHKDPDIKLVMAKDFYYFHKRE  
VSEYTHKELITQNMFFNSGDTWKVLRQNLTSLFSSSKMKNMFYLIESCARSLE  
NVLKQEMEKNNDTIEMKGLLARYTMDCIGSCAFGIETGTLAKKSLKNPFTIMG  
EKLFDVSNYGGFRMVSRALWPAIFYKLGFTMFDRDITHFFKKLLTDVFESRQY  
SESSRNDFVDLVLTWKKRNYLTGDSISNIKTGDRETISLDVNDDLISQCVLFF  
AAGFETTATTTSFILYELAKNKAQERVIEEIDDYFKRHEGKIEYECINEMPFV  
QACLDETRLRYPVLGVLTVREVAEEYTLPTGLKLDKGTRIHIPVYGMHHNPDYF  
PEPEKFRPERFYGDEKKNIKPFTYMPFGEGPRICIGLRFKMPITAGLLTVFKNY  
RVELAEDMPLEVDVFQPRALVIQAISGIYKLIPR

>HaCYP25

MNAVIEELLSLIAEYWKLLLIINLIFYFYFYQTQTFDYFKKRNIKFKKPIIFFGNT  
LSRFTSKKPFHIFQINVYNYFKGERMGGFFEGHRPRLYILDPDLIKAITISDSH  
FIDRSVVKTREPRYLSRSLALQGGEWKAVRSLITPTFSSSRLKNMFPLIQHSC  
NQLVELITSLDESEIELKNVTGHLTLEVTGVCAFGISTDGLKDKNAEFYKIAEN  
FNYMSVRKRISLLFIFLFMPSSLKYINISFLNGESISKLIKILQKTKAERMSAESK  
RSDFLQLLVNVALQEKVETANTTTSTKRHLDDDTLDAQALLFLLAGFETTSTL  
LSFFFHTMAVQPDIEKLRVHIEEVTQGQELTYDHLAQFEYLEATIFETLRMYP  
PLARLDRACKPYTIPGTSVHLGVGDVVVIPAYGIHMDPDIYPEPEVFKPERFM  
KEERKERPSHLFLAFGAGPRNCIGLRFAMVVAKTAIVTLMRNFKFSAGPKTEN  
PIQFHRSSFLLKPQNGIWVKVEKI

>HaCYP26

MIALTFLVTLFVLYIYSKRNHTFWKLKGVTHDRPIPFPGNNLRNFLMRKSVT  
EIAVEMYRKYPTEKAVGFYRASLPILLRDPAMIKRVLITDFLYFYARGLNMDK  
HHIEPLLRLNFFADGDVWRLLRQRMTPAFTSGKLKAMFPLIVERAERLQARLL  
TAAANEEEDARDIMARYTTDFIGACGFGLDSDSLQDENSPFRKLGSTIFNKSP  
RDVLVITLKHIFPGLFKDLKIFGQAEKQIIRLVKEVLRQRNFEPGRNDFIDLLIE  
IKKKGKIVGQSLERMKPNGDPEIASLEMDDDLMAAQVFVFFAAGFETSSSVSS  
ITHELAYNPKIQLKVQKEIDTVLAKYDNKLSYDAIKEMTYLEWTLKEGMRV  
FPSLGILVRECVRKYTFDEINLTIDKGVRIIPLQALHNDPKYFPDPDEFRPERFD  
PANFDVTNKHVYLPFGDGPRACIGERLGLMQALAGLVAVLARFSVQPGPSTQ  
RQPVVNPGPSTSVQTIKGGLPLLFIERKSHI

>HaCYP27

MFLIFLCILITLYFYGTRTFKYWVKKGVKYDKPAIFFGSSLKQFFDNVSVSGRF  
AALHRAYPNEKFVGYEYFHIPGMLIRDPELIKHILITDFRYFHSRGLNPHKTVIE  
PLMKNLFTVDGDVWKLMRQKLTPVFSSGKLKAMFPLIVERTLKLEVLAKRLA  
ETGEEFDIRELMARYTTDFIGACGFGIDSAALEEENSDFRKLGRIRFRVTIRDQL  
VRILKILAPETFRNLHFFPPEVERNTLSIIKQIMSERNFKPSGRNDFIDMMLELK  
QKKGKIVGESVEKRNPDGTPQTVELELDDQLIAAQVIVFFAAGFETSSSASSFLL  
HLLAFHPEIQERCQKEVDEVLLKKYDGKLCFEAVKDMKYLEMAFKESLRCLPS  
PGYLIRKTVSKYTLPGTNVTLDEDVFVISTEALCSDEQYFENPEAFIPERFHP  
DNIDKIKKWTFMPFGDGPRSCIGERMGIMQSMAGVATILSKFTVEPSRNTIRKP  
RIDPSSLLVEIIVGGLPLAIKHRQKI

>HaCYP28

MFLIIVGILLIVLYFYGTRNFKYWEKKGVKFEKPLVLVGSNLKQFIDNVSVSER  
FAALHRAYPNEQFVGFFEANNPGILIRDPELIKHILITDFRHFCFRGLNPHKTVI  
EPLMKNLFTADGDVWKLMRQKLTPFSSGKLKAMFPLIVERALKLEVLAEERL  
AETGEEFDIRELMARYTTDFIGACGFGIDSAALEEDENSQFRKLGKRIFRITKRD  
QLVNLLKRSAPETFKNLHFFSPEIEKNTISIIQQIMSQRNFKPSGRNDFIDTMLEL  
KQKGKIIIGESMEKRNPDGSPQTVELELDDQLLAAQVFAFFAAGFETSSSASSFL  
LHLLAFHPEIQERCQKEVDEILQKYDGKLCFEAVKDMKYLEMAFKESLRCLPS  
PGFLIRKTVSKYTLPGTNVTLDDKDIIVISTEALSTDEQLFEDPESFIPERFHPDN  
VEKIKKCTYMPFGDGPRSCIGERMGIMQSMAGVATILNKFTVVPSHNTVRKPR  
IDPSSLLVQIIDGGLPLAVKRRQKK

>HaCYP29

MQHLRRSAFSLLRV NKQFTRSV ALNNVAEKTSEDNLKSWLEIPGPSSLPIIGQM  
HHFLPGGLLSYTD ELLIDVLYREFGPIVRLDGYFGGPSTILLYDGD AIAQVLR S  
ENWLPARPGFQSLTY YRENIFKKKSDPPDAPTGLITDHGEVWKKFRSMVNPIM  
LQPKTIRLYSGILNKVAEDMVKRMRLIRNEKNMLNGNFD MEMNLWALESIGV  
VALGGRLNCLDSDLPDDSPAKKLIQLVHDIFISADELDFKPSLWRYFSTPAFKR  
AMKHYDDQLKISKFFIDKAIEELKTKGTSSNEEKGILEKLL EIDENVAVIMATD  
MLFAGVDTAANTMTATLYYLANNPEKQNKLR EEILLKQEKQQYLKACLKEA  
MRLMPVVAGNMRLTSKEYNILGYKIPKNSYVSFIHQTL SVLEQHYPRAKEYIP  
ERWIVEKSDPLYHGNAHPFAFSPFGF GVRSCIGRRIAELEMETFLAKVIENFHV  
EWFGPPLKTKQSSLNYIVGPFNFVFKDVK

>HaCYP30

MLIVYPLILLALFCYFLYYYFTRTFDYWKS RKVPGPQPLPIFGNLKD VVFRKQ  
NTVTIYKEFYDEYPDEKMVG IYRMTTPCLLIRDLDIKHILIKDFNYFIDRGIEFS  
KKGLGANLFHANEEIWRPLRSRFSPLFTSGKLKHMVYLMVERS DIFIKYVKAL  
TDIQPEQNVYSIIQKYTISSISSCAFGLDIDIENKKFMTTIDKIDKLIFTRNLMQE  
FDLMYPGV LKSLNLSLFPTEIVFFFKDLVDKVLQARNYKPTNRQDFIDLILELR  
QQNNVLLNKKTEVGDEEFFEVTDDIITAQAFVFFAAGYETTATTMLYMVYEL  
AKNPDVQEKIIAEIDETLK KYKGEITYETLCDLHYMEKTFDETLRKYPIVEPLQ  
RVAKFDYTIPGTNTVKKGQIVVLSVMGIHWDEKYYPNPKKFDPDRFSPENV  
MNRHSCAYIPFGQGPRNCIGMRFAKIQSRIGLLKLF SKFRVTPSKNTPESMIFNP  
MRITLSPQPNLLLNLIPRDDIK

>HaCYP31

MDLSTDSQTSTFKITLIGVLVTF SILICLYIRKIYNYWKDRGIPYDKPLPIVGNLG  
FLMRRSVWDYCYELKNRHRPDYLGIFLAWTPVLVVQTPELARRILTKDFEYF  
QDRYLYSGYSDPLGALNLF TIKNPLWKTLRYELSPMFTASRLKKVTELMNVN  
ATELVHKVQRDINSKKDFNLKELFSMYTSDTVANTVFGIRVSILNDKPSPLWFI  
TRNMVQWTFWRGLEFTMIFFVPAA AFLRLKFFSGAATDYIKKLFWTVAESR  
QKTETSNEKDLVNLLLKLREKLKLPT EPDSPLVDDVILAQA AVFILGSIETSSTT  
ISYLLHELAYHPEEQEKL FNEISEAVKRKGNDVLEYNDLLELKYLTACINETLR  
KYPPVPYLDRLCKNNYKLDDNFII EKGTPVFLNVVAIH YNEKYFPEPEKWRPD  
RFITLAESDNADFTFLPFGDGPRFCIGKRYGMMQVRASVAQLIQKFKMEPAVP  
YAVKPD PYAVILAPENGLSVKFVPR

>HaCYP32

MQSLRRSTLYFQINNQFVRSITINNTAEPTSEQSVKIKSWREIPGPSSLPIIGQLH  
HFLPGGSLSSLSVLQPGNLYKTYGPIIRLDGFFGSPGLVLLFDPEASSQILRGEN  
WLPYRMGFESLDYFRKEYKNNVTDNEPTGLVTDQGEVWKKFRSTVNPIMLQ  
PKTIKLYKNSLNEVAEDMIKRMRLIRNSENMLEGKFDEEMNLWALESIGVVAL  
GGRINCLDLNLPEDSPAKKLIHTIHGIFKTAE EIDFKPSLWRYISTPGFKRAMKL  
YEDQVELSKFFIGKAIQKLEENDVSSKEKGVLEKLL EIDEKVAVIMASDMLFA  
GVDTASNTVTATLYLLAQNPEKQNKLR EEVISQAEKRPYLKACIKEGMRMLP  
VVSIGNMRKTTKD YDILGYRIPKNTAVTFQHQLSSMEEQFPRAKEYIPERWIT  
EKTDPLHHGNAHPFAFNPF GFGARSCIGRRIAELEIETFLGKLIENFHV EWFPGP  
LKIKPSTLNYTVAPFN FVFKDVK

>HaCYP33

MFKYTSFLNLNKKICRVISLRSISTSNSIKSIEGGSVKDWRDIPGPSSLPIIGPLLHF  
LPGGLLHDRNELQETLYKNYGPIVKIDGNFGSSTLIFIYDPEAAFHIFRNENWM  
PVRPGFPSLEYFKKHYNRKKDEPCTEFTGLLTEHGEIWRKYRSIVNPVMLQPK  
TVQLYKNILKEVGEDMVKRMKSRLNNNNMIDGQFDKEIYLWALEAIGVVAFG  
SRLHCFDSNLPPDSPVSKLIQVVHDMNSAQTLDFKPSLWRYISTPTFKQAMK  
HYEDQIKLNEYFINKAIEHLEMKQKTNDEKGVLEKLLEIDHKVAVTMASEML  
FAGIDTTANSVISLLYLLAKNPEKQIKLRDEVISKKERQSYARGCIKETMRLMP  
VVGGNFRQTTKEYNVLGYPKDSFVIIGNQSMSIMEEQFPQPKFIPERWIVD  
KNHPLYYGNAHPFAYSPFGFGVRSCIGRRIAEEIETFITNVIENTHIEWFGSPLK  
THATTINYCIGPYNFVFKDVK

>HaCYP34

MLTLILSILLTLCLLHYLFYCNNAKLCLKVPGPIKFLLGNSLETLVSPVELFAL  
TRHWASLYNGIFRFYAYFHASIIYNPEDIEIVTSSMKYHKKSGVYNLLAPWLR  
NGLLLSSGSKWQRRKILTSAFHFNLQKYHVALEDNSQRLIKVLEETNGEST  
NIVPFISEYTLNTICETAMDTQLNEESSEAGKLYKKAIHELADLLIQRVSNILH  
PKAIFDLTSIGRKQHRHLSIIHRFTKSVIEERKKIYDDKCEGEFKLRENERNISSR  
KKRKRHAMLDLLISAEKEGLIDAVGIQEEVDTFMFEGHDTTASGLIYSLLSFAN  
HQDIQDKIVEEQNNIFGEDTRPATMDDLAQMRYLDCCIKESLRLYPPVPFISRQI  
SEDTVLSGYKIPAGAYCHILYDLHRQEHLFKDALKFDPDRFLPENCVGRHNY  
AYLPFSAGPRNCIGQKFAMMEMKSALSAILRNYKLIPVTKHSDLRFRSDLVLR  
NSGPVYVKFVKRNLVK

>HaCYP35

MKHFSGYRFTSKNHIKPFDAIPGLSSLPFLGPIHHFIPGIGMKSFLSYQKMILMI  
TNETLLIAGSVGLHANFYDLSKVLFEKFGSIVKLDGIFARASMVILYEPEHFDQ  
VYRSEDTLPSRPGFDSLVIYRQVMRKNVTGGVYGLTIAEGSQWRDFRTKVNP  
ALLKPKLVKLYTPALEVIAEDMVVRLIKLQEKENYLEQNLD FEMTKWSLESV  
AVVALGTRLGCFDDKLTDDHPARILMKCSKDLMEAWKLEFSPSLWRYYETR  
NFKKMVKTLDSQWEASVKFINETKTKINERGHDIPEEDKSVIEKLLAVDDKVA  
IMMANEMLFAGIDTVSFTTICLLYNLATNQNAQEKLRNEIRSQENSRYLRAC  
LKESLRLYAVIPANLRRTTKEHTIDVVAPNEFLSRMDKYYPRAKEFLPERWLVE  
KSDPLYYGNCMPMTLPFGFGVRSCIGRRIAEMEIEVFIKRLLRDVKITWEGPP  
VQVVTRVMNSLKKPYRFKFQLIK

>HaCYP36

MLYSTPPPLVDWSGVPTLVLALVALVMAATALLTRSMEGKRPSRLPGPPALPLL  
GTRWLFWSRYKMKNKLHEAYEDMFRRYGLVFAETTPGGAIVVSIAERTALEAV  
LRTPAKRPYRPPTEIVQVYRRSRPDYASTGLVNEQGEKWHHLRRNLTTTELTS  
HTIQGFIPELNGICDDFLNLLQSCRRPDGFVHGFDQLTNRMGLESVCGLMLGT  
RLGFLERWMSGRATALAAVKAHFRAQRDSYYGAPLWKFAPTSLYKTFVRSE  
ETIHLIVSELMEEARARTRGAAQDDGMQEIFLKILANPELDMRDKKAVIDFIT  
AGIETLANSLVFLLYLLSGRADWQQRRIRSELPSCGELRIEDLSSAPSVRAAVNE  
AFRLLPAPFLARLLDTPMTIGGYRLPAGTFVLAHTGAACREENFWRASEYL  
PERWIDIREPHAPGIVAPFGRGRRMCPGKRFVELELHLILAKILQNWVRVEFDGE  
LDIQFDLFLSPKSPASLRLVEW

>HaCYP37

MIAFITVICLLLVIILTSWIIIRDSEKRFNVPGPLPLPLIGNGLLFVAKPSEFLPILHK  
QKENFGDAFRIHLFHTPYIVLSHPRYVEALVSDVDLITKGHSYYFLRPWLGDG  
LLTSTGNKWKVTRKFLTPAFHFNILQNFLPVFLKNEKILIKKLQNYIDGTAFDIF  
PIIALTALDNVTESIMGVSINAQNNSESKYVKSIESLAKIIALRMRNPFVGGDAL  
FNLLPYKKIQDEALDVLHSQTRAVIEMRREELRKLNITDLCGKTDIGVKNKNA  
FLDLLLLSEIDGKKIDDDRVEEVDTFMFEGHDTTTSIGCFALYCLSKHPEAQE  
KILEEQKRILGENFDRDPLYTEVQQMKYLELVIKESLRLYPSVPLIERLMIKDTV  
IAGLNIRKKSSVLINIFEMQRHPDLYDNPLEFRPERFESASANSKNAFSWLAF  
SAGPRNCIGQKFAMIEMKVTIASIVKHFFVQSGDNETLGLCAELILRSENGVK  
LKLKPRIMN

>HaCYP38

MLYVLLFFVLVILLHYYVNILNKDVNFEEKIPGPKGIFLFQNGFDFLQESPALFT  
YFRHYSSKYKDIYKLKLLHKKFLLILNPEDVETIISSTKYNDKGFMYYFLKPW  
LNDGLLTSSGTKWHQRRKILTPAFHFNILRHFNTILVENSEKLVKNLQVEVDKP  
KTNIYNYVTTMTLHSICETAMGTALDNETGIGKSYKDAIHVLGTYLLYRAQRF  
WLHPMSLFLNLSNVGRNQKKLLNKISSFRDHVVKQRRENGNYKKIFNEVMND  
EEHDSLVDKKRRLAMLDDLLEKEEEEGKIDVEGINEEVDTFMFEGHDTTATALQ  
FAFMLLANHPKYQDKILEECQNIFGSSDRKPTMNDLAEMKYLECCIKETLRLY  
PPVYFIIRNCQQDVKLKDYECASAGVDCSILIYDLHRRSDQFKEPLKFRPERFME  
EPTWHRFAYIPFSAGPRNCIGQNFAMMEMKLAISAVVRKYRLLPITTPQDIVFI  
VDIILRPKDPFVKFEKRE

>HaCYP39

MLLTLLVVISIIGLLLYLDTIKPKKFPPGPKWLPILGSALEVNKIRQKTKYLYKS  
FKELSKLYSKDGHLGLKIGKDRIVMVNTVEANKEMLYNEDIDGRPQGIFYQT  
RTWGERKGVLLTDGELWKEQRKFLIKHLKEFGFGRKGMSEIAFAEAGHMVN  
DVLEILDNKDSAVVPMHNFFSTYILNTLWTMMAGIRYKPSDPQMILLQAILFD  
LFSAIMVGCPSHFPILSVLAPKSSGYSDFIRIHQRIWQFLRDEITVHKMRFPD  
NNEDKDFMDVYIRILRDNGEINTYSEAQLVATCLDMFMAGTETTNKSMSFCFS  
YLVREQNVQKKAQEEIDRVVGKDRFPCLDDRSNMPYNEAIVHECIRHFMGRT  
FGVPHRALRNTTLAGYNIPKETMVVSNFPNILMDEELFSEPYSEPKPDRFIVDG  
KLCLPDYFFPFGLSKHRCMGDILAKCNIFVFTTTMLQRFSLLPLPGGPPPSLDH  
VDGATASAAPFDALVVRRI

>HaCYP40

MFILILICVLFGVMTWFGKRRLKNNPPALPGALPLIGHAHLRYRNREPFRLWN  
LFKEWSYECLKQDGLVTYFPGQTIYALSDPDDFLTANACVQKDNIYEFGKP  
WVGEGLLTANSSTWKIHRKLLNPAFNPIVLDGFLDVFNKQSRRLVKKLEIEIGK  
ESFDPISHVKNNALETVCLTALGLDLNEKSELNSQYIHSVYQACHIFMERSKRF  
WLHNDFIYSWSLLKKQQDECVKIFHTMSKTIQRTKADYVYNNCQTEEPQG  
PKFMAFMKLLLELTIEKKLLNDDEIREEVDTIIVAGYETSAIVLIFCFIMIGSYPK  
VQEKVVNELHEVFGEDDRDVTKHDL SRLVYLD AVIKETLRVYPIIPILARYLD  
KDVKL RNYMLPKGARCFVSLYGIHRSSVWGSDAEFEKPD RWMNPASLPKSST  
AFVAFSSGKRNCIGKSYALMSIKTTLVHFLRNYKVQGDHTKMILELDIALKPV  
SGHHISIKKINNKNRI

>HaCYP41

MLFVLLIFVCVILSLIFYEKYRKNYWKKHGIVQVDGILSKFTWGNRSIAEVYK  
DVYDDHPTESCIGMYLGTQPALIVKDVQDIQAVLQGNFENFHSRGIFSNPKDIL  
SDNVLFMGDYRRWKLLRNKLSPVFTSMKIKNMFYIMERCAQDFVKFLDSEQ  
FTPDNTFNALYTYTTACIGATIFGIDTHTRNTMDSPFLEMTRKSIEPSLINNIKFS  
LANMSPTLCNLLNLKRFGDSEEFFIGTVKRVLNIRRNTEEKRHDFVDMCLELQ  
RQGTMRDRTVTGYEIEATDEVLAQAFFFFLAGVDTSATVMHFTLLELASNQNI  
LEKLHMEIDRVFDECDEKLTYEDISKLEYLDMVMSESMRMYPPIGSIQRCCTK  
NTYLPTSQVQVKENDFIIPVFALHRDEKYYKNPNIFDPERFTTANTSNIKFSY  
LPFGEGNRMCLGTRFARVQVKSGLAWLLRRFTLKERKYEPKTFAPSFSLRDT  
KSNFELIPRKKSC

>HaCYP42

MLILMLTCLVLGLLVLNRFIQRKPNKDEPPVLPRALPFIGHAYLWLGSTTRFW  
NTLKKWSYDSQNHGVASFRIGPMTLYVISDPDDFLTVCNACLDKNEFYDFA  
KPWLGEGLITGKASIWKIHRKMINPSFNQIALDGFLEIFNKQSRHLVKNLEIGIS  
KTSFDSYTYIQNNALETICQTALGLDINDKNMRNSQYLLAVDEILNVMMKRIQ  
KLWLHSESIYKWSSLKKKQDECLKILHTTSNTILQKTKAEYLSNKSSEYNQGP  
KFRTIMRLLMELSVEEGAFNDREIRAHVDTMIAAGYETAATALMYCILMIGSY  
PKVQEKVFEELHDFVFGDDDRDVTKECLSRLYYLESVVKETLRVYPVVPFVTR  
HLDKDVKLRNCTLSKGATCLLSIYGVHRSTKWGPDAEEFKPERWLNPASSSK  
SPAPFAGFSVGRRSCIGKTYAIIISLKTTLAHVFRNYEIKADHKKMEMKFEIVLK  
PVSGHHIFIKRRTTQN

>HaCYP43

MLWQILLPILVCVVIWKLFKTEDNDLYRLPGPPAWPIVGSALSFLGLSHVQMF  
ELLLEFPKKYGNRVVFRVLNRLILHIYNVEDIEIVLSHSRNITKNKPYSFIEPWL  
GTGLLLSTGPKWHSRRKILTPTFHFDILKGFMRVFEEQSRNVVTELRRMTSVG  
SGVVDVMPFVSDFTLTYTICETAMGIQLGADKSEAKLKYKDAIMDIGQLVMKR  
LTTIWLHSNFIFSMHPMGKKFAQCLNNVHSFADSVIMERKQAYENDGEVLG  
DSGSKRRLALLDLLLEAERKGDIDLEGIREEVNTFMFEGHDTTATALTFGLML  
LADHEDVQKRIFEECKSVLGDTRSPNASELAEMKYLEAVIKEILRLYPSVPFI  
GRTIVEDFMLGDIKVKKGSEVVVHIYDVHRKPDLYPEPDAFKPERFLEGDSRH  
PYAYVPFSAGPRNCIGQRFKLEMKSVISEIIRHFKLEPLQRGARPTLKSDLVLR  
PNEPIYVKFIQR

>HaCYP44

MMRIILQLEHFSDDIERLYTTTFPEERFIGKYEFIKPTVMINDLELVKKITIKDFEH  
FLDHRVVTDENVEPLFARNLISLKGQEWKDMRSTLSPAFTSSKIKLMVPFMEE  
VGEQMIRALKKKIKESDTGYIEVECKDLTSRYANDVIASCAFLKVDSTHDEN  
NQFYKMGKEISTFTVKQIFLVIFSAFPSLAKRSNLTIFSRKTKNFFVGLVLGTM  
REREDRNIIRPDMIHLLMEAKKGKLTHDNLGNNDKDTGFSTVEESSVGKTTID  
REWSDMDLVAQAVLFFLAGFDTISTAMSFALSELALHPEIQRERLAQEIKEHHVK  
NGGKLNFTSIQNMTYMDMVTSEILRLWPPAIALDRVCVKDYNLGKPNQSQTSK  
DYYIRKGEIISIPVWCFHRDPAFFPDPKRFDPERFSDENKHKINPMAYMPFGVG  
PRNCIGSRFALCELKTLTYQILLHMEISPSEKNCLPVKLCTESFSRPMKGGHWV  
KFKART

>HaCYP45

MWLVYLAVFILVLVIVDRWWSKEMVNLHKELDVGITYVPVLGHVYKLIGNGE  
VRMAVLEEVRGRKALNNVHRMASMWIFNYTWVVVSDPEAANFILKTCLDKG  
RLRSFARHLFGNGSIFASVNVWRPRRKVLAPMFSLKKLNKFIEIFEKNSIVMVE  
QLASVVGKGNFSIEKFINTYSFDTSCETTLGESVNSQRQADHPFLVALTNYAEN  
IIDRMCKPWLHIRAVYKLTESYADQVKYKKTIYNVVEKVIKKLYCRLSTQVQ  
SFLETLTDLRFNDVELREEALILLAAATETALSSGYTCVLLAHHADVQDRVY  
KEIQDVLGSDRSICADDLINLKYLDAVLRECLRLYPAPMLVRTCHADVTLPS  
GLILPKGTNTVINTWVIHRNPQYWGDANEFRPERFLNVQRDQLASFLPFSSG  
PRNCLGYHYAFLTMKTNLATLLRRYRIVPATSFKYDGRSPLRVKFSATLKHVH  
DYEVLQESRV

>HaCYP46

MYSLISICIVLCLLMWFSRKRKNNEPPALPGALPLIGHAHLFRNSTEFWNLLK  
DLSYKSQKADGIISLQIGPQTVYVLSDPEDFLTVSNAQLQKNVSYDVPKWTWIG  
EGLIVAKSSIWKVHRKLLNPAFSQKILDGFLDVFNKRSREFVKLLDIEIGKRSF  
DPYNYIRHHALETICQTTFGMDFNDGQFIMAVDQICHIFAERVQKLWLHNFMF  
SWSSLKKKQDECLKILHMSNTMLQKMKIDYSNSKNSMENTEGPKFKALLN  
YLIELEAERGVLDNDQEIREEVDGTILAGFETSATALLYSMLTISSYPEVQEKVIE  
ELHEVFGDDDRDVTKHDLRLYYLDAVLKETLRIYPVIPGIARHLDKDVKLRLN  
CTLSKGSTCFMLIYGVHRSPIWGPDAEKFYPERWLDPTSLPKLPTAFAGFSAG  
RRNCIGKTYAFMSVKTTLVHIFRNYKVKGDHTNMQLKFDVVLKPVGTGHISI  
QRRNKILL

>HaCYP47

MYAIAITILVLIITGYIHKSTRKPKNFPPGPKWYPIFGCSNLVHSMARKQGSQWK  
SLSMLAKEYKTKVLGIKLGPEPIVVTFGENNVRRVFTEKEFEGRPTSFIRLRC  
LGKKMGITFADGTLWRIHRQFTVKHLKNVGFVKTVMESEIQKEMQNILNYIA  
DNGNKPINPKNILATSVMNILWKFTAGERIKGDRNLNLLDLLNTRSKAFSMAG  
GWLNQWPWIRFFIPEISGYTLIKNLNQQISDVIEEAITKHKQNLILENDFMYSFL  
EEMKENKETFTEEQLKIICLDILIAGSQTTSNVLEFAILKVMKDKIIQEKIFDEIS  
KILGDDLPSWNDTSRLIYTMAYLYEIQRFFTIVPLAGPRRALDDINMDGYLIPK  
DTTILISVGDVHFDPEIWEEDPKFMPERFIDKTGRITNIEHIYPFGIGRRRCPGDS  
LAKSFIVFVGIMQRYRIECTNGIVPSEEPHGLISSARPYSAVFIPRP

>HaCYP48

MLYYLFFVILFILLVVDRWKPRNLVKLHQKLGTDWQYVPIIGHAYKFIGNNEGN  
NVSLFSLILLKCYDSWLIYIVVYPINLFCCLVTADIIEATSVLKTAMDKSFGRFTY  
NLIGNGSVHAPAEIWHRRRKILVPSFASRHIKKYLRVFEANSKMKVAKQLGSRV  
GKGNFSSWNYICRQTLDSICETTLGVNIGVLKEQDHPFFKALEEVGKIIAVRIC  
KPWLQIDALYKFLPIYKRQKYTTKIIHEFIDNVSTTFKSFLLEMIENSEKTDGTY  
TQEELREEALVLLIAGTDTTATAICFIVLLSQHQHVQEKVYKELEEILGDTNKP  
IEVEDLVKLKYLEAVIKETLRLYSPVPVLTRDSKNDFQLPSGLTVPKGCDVIIHI  
LGIHHPRYWGADVEDFKPERFLKDEKPDAFIAFSNGPRNCVGLYAMISIKA  
TLSIILRRYRLLPATSFYRNKKNPLRLSFDIFTKHLDNFEIQIEYRN

>HaCYP49

MWLVCLFSIVLLLIVDRWWSKEMINLHKELATDITYVPVLGHVHKLIGNSEE  
RMAAVQEIGRKSFNRRHNMASVWIFNYMWVVISDAEAANIVFKSCLDKGRLI

SFARHLFGNGSIFAPVEIWRPRRKLMAPLFGFKTLNKFIFEKNSLVMVEELA  
SAVGKGNFSIEKYINAYTFDTSCEITLGEVSNSQRQTDHPFLVAFSNTENLIDR  
MCKPWLHLGAVYKQTAAYIDQVKYKETISAVITGKSHIQTFGLSLTEHSGYND  
VELREEALILLAAATETALSSGYTCVLLAHHADVQDRVYQEIRDVLGDSSQA  
ICSDDLNNLKYLDAVVRESRLRYPPAPMTVRACHSDVRLPSGIILPKGTNTVIN  
TWAHRNPQYWGKDADEFKPERFLSAQREQLTAFLPFSSGPRNCLGYHYAFLT  
MKTNLATLLRRYRILPATSFKYDDQNPLRVKYCATLRHVHDYEVQLENRY

>HaCYP50

MQEIFNAKSVTDMAVEMYWKYPSEKVVGFYRGSRPელიIRDPEIAKRILTTDF  
AHFYPRGLNPHDQEIEPLLRLNFFADGDLWRLLRQRMTPAFTSGKLKAMFPLI  
VERAERLQVRALSAAAAGQEIDARDLMARYTTDFIGACGFGLDSDSLKDENS  
AFRQLGAKIFNFGAKEILIVALKEIFPFLFKNLKTLTRVDKDMYRLVNEVLRQR  
NYEPSGRNDFIDLLLECRKKGTVGESIERTKSDGKPEVATLEITDDIIAAQVFV  
FFAAGFETSSSATSMTLHELHNVEVQNKVQEEIDRVLAKYDNKLCYDAIKE  
MRYLEWAFKEGMRIFPSLGFLIRGCARKYTFQDLDTIDENVRVHPLQAMHN  
DKKYFENPTEFRPERFDPENFDADNKYVYLPFGVGPRACIGERLGLMQSLAG  
LAAVLSRFSVRPARSTRRRPAANPASGIVQTVSGGLPLLFIERTNSVS

>HaCYP51

MFYYLLLTIIILLVLDLWKRWKYLELNRAIGIDCIYVPFIGQAYKLFGDNETIYT  
IMKKAISYGYNRKHGTVGGWFGNELVVGTVDPTEATAVLKTA FNKTFIYEF  
ELLGNSTVFAPATTWHRRRKILASTFAPRLVNKFIRIFEKKAKLLVQLLEPKVG  
RGNFSCWDLISSYELDSVCETTLGVDINVLRDPDQPFVKAYEEIFKTALTRLFR  
PWLQIDVLYKLLPVFRRQQHRKQIIEFIDNIIYKKEEMLREKAINKDKIDNGT  
NNISFLELMIEGSEEAGKRYTPEELREEAVMLLLAGTDTTSTGLCFIMVMSQ  
HQDVQENVYKELKEVLVSAIVRDSEQEFVLPSGVTIPKRCNVITSIAGINCNP  
YWGTDHIFKPERFLSKQTLVPGAFMSFSYGRNCIGYSYAIMSMKTVITTILR  
QYRLLPATSFKYDENTPLRLSYEFMTKHVDNYEIQLEYRH

>HaCYP52

MSGPLPIGHTHLLLGNTTQLWTFKLNLYSEIQKQNVTCALHLGPIKVFYVVS  
PDDFLTVA NTCLEKAKFYEFAPLAGEGLATGQVPIWKFHRKLLNPAFNQIVL  
GGFLDVFNKQARRLVNDLEIEIGKSSFDHYRYIKHNALETCLTALGVDLKEK  
SELNRYIMADVIANLLIERLQKPWLHINFMYKWSTLKKRLDEVSKVVNTM  
CETILQKTKVNYLMNKNREVEHMQGSKKTFFMYLLTELSIEKGVNDREIRDE  
ANTMIAGGYETSATALMFCVLMIGSYPKVQEKIVEELNKVYGDDDKDVTKY  
DLTRLIYLEAVIKETLRLYPIVPVARELEKDVELSDCTLSKGGTCLLFIYGVHH  
SSIWGPDAEEFKPERWLDPSLPSKATAFVGFSAKGRNCIGKGYALMFLKTS  
AHLFRNYKVKGDKHKKMELKLDITLKPVS GHHSIQRRNI

>HaCYP53

MKKSAPETSEICDQFPDEPYVGILYGTEPALI IKDPNIIRLVLSKDFYFSGREIT  
SYAHRETITN NFFNGGDEWKVLRQNLTPLFTSAKLKKMFPLIQTCNNELEIFL  
KEETRIS ETIHARSFFARYAMECIINCAFGINANTMKRNIDNNIFFIVAQKIFDST  
FMRGLKMACRAMWPFLFYGLRFELFDEKIVTFFRTIFTEVSKNRANEKSTRN  
DFVDLILNWNQKYITGDSLSNMKTGGNKVNSIEVDEELLSQSILIFAAGFET  
TSTATSFLLYELSKNKKALDKVIEEVDTYFEKHSVIEYECMH ELPYIEACIDEA

LRLYPVLGVVTREVMDDYVLPTGLRLKKGDRIHIPVQHLHKNPDYFEDPEMF  
RPERFLGDEKAKIKPFTFLPFGEGPRTCIGIRFAKMVMFPQFLTLFKNYRIELAE  
GTPLSVEFNPASIATQSMTDLKIKCIAR

>HaCYP54

MTRKHGSQWKTLVLAKEYKTNVLGLKLGSEPVVIFFGENNVRSAFKEAAF  
DGRPESFLRKGMGITFADGTLWKVHRQFTFTHLKAVGFGKPMMESEIQKETR  
AILSINKNIDKPIDPKNMLAAPIVNILWKFIARELDAKREHRRSAFSFAAWAN  
ESSSLRRGGKDDLQKFPRIDLARDQNARVPERRRTSLSPLLPMFSDFAFPGGRI  
VLLSNYADLEDAIKKHKKNLINENDFMYSFLKEMKHNIATFTEEQLKVTCLDI  
IIGGSQPSSTVIEFAILKVMWDKNIQEKIYNEIVNNLGDKLPSWSDSDRLVYTK  
AYLYEIIRYFNIAPLAGPRRALHEVNMGGYVIPKDTTVLMSIGDVHIETDIWDE  
PDKFMPERFIDKTGCLRNIHLYTFGLGHRRCPGDTLSKSFIFIVFTGIIQRYRIE  
CVNGILPSEEPHISLLSHARPYEAQFITRH

>HaCYP55

MGIFWDFLTNNQAMFEHLHDIYKQYPNDPAVGLGSMLTPTLYVRDPANVQFV  
LSSEFTSFSHRGFANEGDVLAENILFLNGRKWKLMRQSMTPLFATAAKLRNM  
YYIMDKSAQDFVGYLKESPKLMKGDFTNNLSTFCCAAISAAVFGVTTESIFNS  
PFLDVAKKAFQSELMRDIKFTIGNLSIRLFKILKLKVFKEYEQFFVGAIKKVVR  
LREKENVKKHDFADICIALQSKGKLDSESDFELEPTDELLAAQGFFFFVAGV  
EPTAAAIATLVELGKNPYILQRVHEEIDNIFNCDGKLTVDIVANINYLDMMVM  
SEALRLHPPIGFLTRMCVKEAVLPTGNIKIDKGTKIITPIFEMHHDAQYYPNPEV  
FDPERFSRENRNAVPDITYMPFGKGNRICIGMRYAQLQAKAGLVHLLRNFTVK  
THVSKGGIKYRKDQVQVRLINVDVEFISRN

>HaCYP56

MLIILLSCLVFGVLLWFQRKRKNKNEPPVMSGTLPIIGHVHLLIGNITNFWNFLEI  
LVSECMKNDGVATFCLGPIKVYVPIWKIHRKLLNPAFNQIVLDGFLDVFNKQS  
RRLVKGFIEIGGEPFDHYIYTKNISLETICLTALGVDLSERSELNSQYIMAVDQI  
FKIFMKRGQRFWLHSNFIYSWSALKRKQDECLKILKTMSYITLQKTKENYLN  
NRNKTDEKGPQFKALMQLLLELMIEKDVLDNTEITEEVDTMIAAGYETSATA  
LAYCVLMIGSYPEVQEKVFNELYEVFGDDDRDVTKHDL SRLTYLEAVIKETLR  
FYPVVPVIARYLDRDVKLNRNCTLSKGSRCFLFIYGVHRSSIWGSDAEEFKPER  
WLDAPASLPKSPTAFVGFSAGRRNCIGKGYALMFLKTTLAHLFRHYKVNGDHT  
KMELKIDVTLKPVSGHHISIQRRNI

>HaCYP57

MFYYFRTLCKNKYKRLFKLRVGHVKIIIIHNPEDVETVVTGTHITKGFVYDFIQ  
PWLQGGLLTSKGSKWHQRRKMLTPAFHFNVLANFKSVIEENCERSFVESLQVE  
VGKPQTDITPYINDFAINSICETAMGTKLDKEASSFGKAYKEAIYKLGQFAVYR  
AQRIWMHPEFIFNLTLGRKQKQILNNLTSFRDIVIEKRRVLNKGLSNGFGDEF  
NNDNSEEIEVYSKKKLAMLDLLLKAEKDGVIDKQGIGEEVDTFMFGGHDTSA  
NALQFTMMLLANHPDVQEKVVEECNGIFGSSDRSATMADLAQMKYLECCIK  
EGLRLYPPLPVIMRKVEHPLKLGNYEVPIGAECGILIFDLHRRSDQFVEPQQFR  
PERFLTEPTWHPFAYIPFSAGPRNCIGQKFAMMELKLALSAVLRRYRILPVTVP  
RDIIFITDYVLRTKEHIFVKLEDRI

>HaCYP58

MFVVVLFLFLSVYYIYFRYKRRALYELSKSLPDTGYLPIIGHTHWFIGGP  
LNNIQQLSRLVQATGEIGKIWIGPSLYIVSLNPDDVQNILENCLQKDSSYRFLQT  
WLGNGLFVAPVDLWKVHRKVLLPIFHNRIIEDYIDVFGEQGSVLVERLEEQLG  
KSEFDVFKYVTSCMLDIVFETAMGEKMDVQHNPDTPLYRARSTVISIIGMRLF  
KAWMQPDCLFKLTSYSKLQKENIDLTHKFTDEVVRKKKELFKKQAKNIKEGR  
RDLELLLDREMKTDEELRDHIDSITIAGNDTTALVISYALMLLGNHAAEQER  
VYLELKDIFGDSKRSPTKEDLNKMECLDRVIKETMRLYTVVPIIARKTQKEIVL  
SKCTVPPGVGCAVVPFVMHRSKQIWGPDADYFIPDRFLPEVSANRHPCAFIPFS  
YGSRNCIGN

>HaCYP59

MGTKRVAVLLNPEDVEILLCSTKSNHKGYYYGFFRQWLNEGLLLSDGKKWH  
QRRKTLTPAFHFNILRHYNVLIENTNNFVNQLQSEVYNTKTDIYPYLTDFSLN  
SICETAMGTVLDEEASEIGKIYKNAVHKLGSYIYYRGLRIWLYPDFIFNLTPVG  
RDQKRLCLKLIASFRNEVIERKKSNNYKTISTELMNEDLDDVFVYKKNRFAM  
LDLLEAEKEGTIDRAGINEEVDTFIFEGYDTTATGLQFAFLVLANHNDQAQDKI  
VEESNRILYSNGKCKPTINDLAQMKYLEACIKESVRLYPPVHLMSRTSNQPIQL  
KNFKCPAGTDYFIPLTPLHRRSDQFIDPMEFRPERFLVEPTWHPFSYIPFSAGQR  
NCIGQKFAMIEMKLVISAVLAEYRLVPVTKPEDIVISLDMMLRTEEPIYVKFEK  
RNKTM

>HaCYP60

MESSVAPPIILLYDGDIAAQVLR TENWLPVRPGFQSLEYRKSILKRESPDTPTG  
LITDQGDVWKKFRSMVNPVMLEPKTVSLYRGILNKVAEDMVKRMRLTRNEK  
NMLNGNFDMEMNLWALESIGVVALGDRLNCLDINLPEDSPAKKLIQLVHDFI  
SADELDFKPSLWRYFSTPTFKRAMKYDEQLKISKFFIEKAIKELKTKQTSPE  
EKGVLEKLEIDENVAIIMATDMLFAGVDTAANTMIATLYYLAQNQEKQNK  
REEIRLKTEKQYYLKACLKESMRIMPVVAGNMRLTTKEYNLLGYKIPTNMYV  
TFVYQALSTMEKH FHR SKEFIPERWIVEKSDPLYHGNAHPFAYSPFGFGVRS  
CIGRRIAELEMETFLAKVIENFQVEWFGPSLKTRPSSLNYIIGPFNFIFKDVL

>HaCYP61

MQIRAMQIRAMQIGAMQIRAMQIRAMQIGAMQIRAMQIRAMQIRATYIIIPPL  
LSNTDLITKGYSYDFLRPWLGDGLLTSTGYKWKTTRKFLTPAFHFNILQHFLPI  
FLKNEKILIKKLNNYTDGTPFDVFPPIAL TALDNVVESIMGVSVDAQNNSES  
NYVKSIESIARIISLKMRNPLVESIFNLLPYKKEQDEALDVIHSHTRKVIEWIR  
REDLRKSNITKLNGDSDLGIKNKQAFDL LLLSEVDGSKIDDDRVREEVDTFM  
FEGHDTTSGISFALYCLSKHPDVQEKVLEEQKIILNNNLDRDPTYIEVQQMKY  
LELVIKESLRLYPSVPLIERLMIKDTEIAGLKIRKNASVIVNIFQMQRHPDLY  
DDPLEFRPERFQLATANSSKNAFNWIAFSAGPRNCIGENEIP

>HaCYP62

MQKSSIAMKATEIYNRYPNERNVVGFFRSTTPELVIRDPEIVKRILITDFHHFYAR  
GLHPHKKVIEPLLRNLFFVDGDLWKLIRKGFPAFSTGKIKAMFPIITESADNL  
QLLAAEITTLDDYDMRELMARYTTDFIVKKILKDRNYQHSGRYDFIDLMIELK  
QKGKVTVDSLEQKDENGLPKKVELELDDSLIAQIFVFFGAGFETSSTTASYTL  
HQLAYNPDYQSKVQEEVDRVLQKYNNQITYDAINEMCTLEKAFNEAMRMYP  
SVAFLMRKCTSTKYTFPEIGLTINEGVNVIIPVQAFHNDDKYFREPKKFNPD  
RF

DSNKNMKNNIFLPFGDGPRACVAARLGKVLAMTGVAAILHKFTVEPCSISKLS  
PIPQPMATVSESFVDGLPLKLRERIKNQ

>HaCYP63

MLIIPISCLVFGVLLWYQRKRKNNEPPVIPGALPIIGHAHLLIGNITRLADPDDFF  
TVANTCLQKDNFYDFAKPWIGEGLISGGGPKFKPLMQLLLELMIEKEVLSRE  
IREEVDTTIVAGYETSATTLAYSVLMIGSYPEVQEKVFNELYEVFGDDDDRDVT  
KHDLSRLTYLEAVIKETLRLYPVVPAPAIARYLDRDVKLRNCTLTGTRCFMFIYG  
VNRSSVWGSDAEFEKPERWLDPASLPTCPTAFVGFSTGRRNCIGPKFRTIMRLL  
MELSVEEGAFNDREIREHVDTMIAAGYETTATALLYCILMIGSYPKVQEKVFE  
EYLPTRWTDGDDDDDDDDDDDDGDDDDDDDDADDADADADDNDDDDDDDDDD  
DNDDDEDPDGDNDDDDDDLITHYCFSILQF

>HaCYP64

MFVYSLIKPFVGSELVAASVPVWKRNRRIENAFKQNILDGYNELFNEQAKRL  
TFAMANKLNKEFDFSEMITRNTLESVCQTTLGINLNDNNTTTNNYLRAVNRIL  
EIMTERVTYPWLFINFIYRWTSLKKEQDDNLKIISNLFQVIKKRKA EYRDGLN  
NEGKTENTQEFRSSLDVLIENSVTKDSEILSDLQLNHIINNLILAGFDTISPDLLI  
TLINIGSYIEVQEAVYEEVRSVMGDNETLTKEIDLKRLTFLEAVIKETLRLYPVGP  
IVARSTTTDIQLQEYVLPADCHVIVHLWAVNRNKKYWGSDADEFEKPERWLNE  
SVPSVPSAFASFSLGRRNCLGKSYGMTYMKITLAHIIRRFKITADDDKKLECDLA  
VMMKPSRGHSIKLESRV

>HaCYP65

MSSRLPIIGHAHLLLGSSTVLTDPDSCLTVANTCLEKNKYAFKPLTGEGLITG  
KASIWKVHRKLLNPAFSQTVLDGFLDVFNKQSRRFVKNLESEIGKSSFDHYTY  
IKLNSLETLCRSKFCTFMHLLIELAEERGVLNDGEIRDEANTMIAAGYETSATT  
LMYCTLMIGSYPKVQEKLV EELNEVFNDYRDVTKHDLSRLTYMEAVIKETL  
RVYPVVPVITRELDQDVKLTNCTLSKGCTCLLFYGVHHSSIWGPDADEFKPE  
RWQNPASLPKSASAFIGFSVGKRN CIGKAYATMFLKTTLAHLLRNYKFKGDHT  
KMELKFDVVLKPVYGHHSIQKRDNKNLI

>HaCYP66

MLILVLICLGFGLLLWYPRKRKTDEPSALPGALPIVGH AHLLLSTVPIWKIHRK  
LLNPAFNQKVLDGYMDVFNKQSRRLVKELEIEIGKKSFDHYKYIQHNALETIC  
HVKFKTFMHTLLEKRVFSDCEIREEVDTMIAAGYETVGTAIMYTVLMVGSYP  
RVQEKVFAELNQVFHNDDRDVTKHDLSRLFYLEAVIKESLRFYPVLPVARYL  
DQDVKLRNCTLSKGCTCVLFINGVHRNPITWGPDVDEFNPERWLEPASLPKSP  
GAFAGFSMGKRN CIGKAYAFMSMKTTLAHIFRNYKVQGDHTKMMLKFDIVL  
KPVSGHQISIQRINDHCI

>HaCYP67

MFTSGKLKKMFPLIQSCNKELEQHLQEETSKTQVIDLRSVFSRYAMECIINCAF  
GINARTMKRADSPNPFVIVGQKIFESSYTRELKMICRSMWPSLFYGLGFQLFD  
EKIAIFFRNLYNEVYSNRVKEKSTRNDFIDLLLTWLKNKHLSGDSLSSMKSD  
NKVISIEVNEELLSQSILIFGAGFETTSTTIGFLLYELAKNQNVQAKVIEEVD  
YFKKHNGIIEYECLSELRYIESCIDETLRLYPVFGVITREVTDDYVLPTGLRLHK  
DDR VHIPPVYHIHRNP NYFKDPEIFRPERFLGDEKMKIKQYTYMPFGEGPRICIG  
N

>HaCYP68

MGTVLDEEASEIGKNYKNAVHKLGSHIYYRGLRIWLYPEFIFNLTHVGRDQKR  
LLKLIASFRNEVIERRKKSNNYKTISTELMNEDLDDVVFVSKKNRFAMLDLLE  
AEKEGTIDRAGINEEVDTFIFEGYDTTATGLQFAFLLLANHNDQAQDKIVEESNR  
ILYSNGRKPTINDLAQMKYLEAFIKESLRLYPPVHLMSRTSDQPIQLKNFKCPA  
GTDYLIPLTALHRRSDQFIDPMEFRPERFLVEPTWHPFSYIPFSAGQRNCIGQKF  
GMIEMKLAISAVLSEYRLLPVTKLEDIVITFDMILRTKEPIYVKFEKRNKTM

>HaCYP69

MLTLIMVSVIFGLLFTYYQRKRNKTEPPVIAGGLPIIGHTHLLLGSSTLLSDPDY  
FLTVAANTCLQKNKFYEFAPKPFAGDGLVTGKGPKFKTFMHLLIELAAEKGVLS  
REIRDEANTMIAAGYETSATTLMFILMIGSYPKVQEKIVRELDEVFGDDDRD  
VTKHDL SRLTYMEAVIKETVRVYPVVPVVTRELDQDVKLNTCTLYKGSTCFM  
FIYGMHHSSLWGPDAEEFKPERWLDPASLTKSASAFVGFSAGRRNCIVTHSSA  
GMGAMAQEVCGLGAELPYPLKLQGPILRHSGTSGDHR SIPPRPGA

>HaCYP70

MYTVMKKAISYGYHRKHGTGGGWLGNELIVGTVDLINATTVLKTALNKTVI  
YKFAFELLGNNTIFAPGTNNRSFLELMIEGSEETGKRYTHEELREESLALVLAG  
TDTTSTGLCFIMVMLSQHQDVQENLYKEIKEVLGEKNDPLDVSDLPKLKYMD  
AVIKETLRLYPPVSVIVRDSEQEFVLP SGVTIPKGCNVITSIAGINCNP HYWGT  
AHIFKPERFLSKQTLVPGA FMSFSYGPRNCIGYSYAMMSMKT VITILRQYRLL  
PATSFKYDENTPLRLSYEFMTKHVDNYEIQLEYRH

>HaCYP71

MKDGISHGYKSIVDPKEATTVLKTAFNKTLIYEFAFELLGNSTVFAPGTNNMSF  
LELMIEGSEEAGKKYTHKELREESLLLVL AATDTTSTGLCFIMVMLSQHRHVQ  
ERAYKEVKEILGEKNDSIDVADLSKLRYMEAVIKETLRLYPPVSAIVRDSEKDF  
VLP SGVTIPKGCDIITSIAGINRNPRYWGTDADIFKPERFLSDQTPVPGA FMTFS  
YGPRNCIGYSYAMMSMKT VITILRQYRVLPATSFKYDENTPLRLSYEFMTNH  
VNNYEIQLEYRHQVNGHPH

>HaCYP72

MSDTILQKTKADHLRNTNRKAENSQGIAFVQHINSHFYNKDVTIYKICKFPGP  
KFKTFIRLLIELATEKGVLS DREIRDEANTMIAAGYETSATVLMFCVLMIGSY  
MVQEKIVEELNAVFNDDDR DVTKHDL SRLTYMEAVIKETLRVYPVVP IVTREL  
DRDVKLKTC SLKSGSTCLMFIYGVHHSSTWGPDAEEFKPERWLDPASLPKSA  
NAFVAFSAGRRNCIGKIYALMFLKTTLAHLFRNYKVKG DHTKMELKFDVLLK  
PVS GHHISVERRNNKNII

>HaCYP73

MVMTDAKQAMAVLKTSSNKSFIHNLVSDLLGNSTVFAPGFKTFLELMIESSKE  
TDKGYTHEELREESLV LILAGTDTS AVGLCFTAVMLSQHQDVQDKVYKEIEEV  
LGDTNRPIEFEDLLKLKYMEAVINETLRLYPPVTILLRDI AKDLILRDFVPNGCD  
FLISILGIHRNPQYWGEDAGDFKPERFLSGESRVPGSFIPFSYGRNCIGNLYGIL  
SMKTTLLTILRRYRLLPATSFVYDQNNPLRLAYEIMTKHVDNFDIQIENRDQRK  
VDTN

>HaCYP74

MDTQLNEESSEAGKLYKKAIHELAILVVQRLSNILLHPKAIFDLTSNGRKQRKH

LSIIHNFTKSVIEERKKIYEDNSELKLRENERNISSRNKRKRHAMLDDLISAEKE  
GLIDAVGIQEEVDTFMFEGHDTTASGLIHGLLSIANHQDIQDKIVEEQNNIFGE  
DTRPATMDDLAQMRYLDCCIKESRLYPVPFISRQISEDTVLSGYKIPAGAYC  
HILIYDLHRQEHLFKDALKFDPDRFLPENCVGRHNYAYIPFSAGPRNCIGIIN

>HaCYP75

MQKEKHNQAEGDSHYDLNSYQNKNFLDILITLSGGEEKGYTDLELREEILTMTM  
AATDTTAVSSGYTLKLMAYPEIQEKVYEEICEVLGDTNRPIVKEDLLKLYL  
ERVIKESRLYPVPFVIRKIEAEIELPSGRILPSGSGVVISIWGCHRDSKYWGPN  
AEHFDPPDRFLPERLNLPHPCNYMPFSNGPRNCVGYQYAFMSMKTVLATVLRN  
YKVVPPEPENGIPIHIKVKLVNMMKAVDGYQVALEKRNT

>HaCYP76

MVINDPSTGCDVIPSDPELLAAQYFLFCLGGIDNIAVMLHFAMLELSRHQKILKR  
LHNEIDGILSDENKCLTFEDLENLKYTDMVISEVLRKYPPVFAIQRRTNDTVL  
PSTQERSVSKGTAVVVPVFALHRDPKNFPDPDKFDPERFSNENLSKIKSFSYIPFG  
EGRRRCLGVRFGRQLSKFCLVSILRKLTLEQDNEIKTFDPSFFTLRNTLARFE  
LIPRN

>HaCYP77

MIEKEILNDNEIREEVDTMIAAGHDASATTLAYCMVMIASYAEVQKNVFNELY  
EVFGDDDRDVTKHDL SRLTYLEAVIKETVRLYPVPIIARYLDRDVKLRNYTLS  
KGSRCVMLVNGVHCSPICGSDAEFEKPERWLDPSLPSPTAFVGFSAGRRNC  
IGKAYGLMSLKTTLAHIFRNYKIQGDHTKMELKLEVTLQPVSGHHISIQRRNN  
KYRI

>HaCYP78

MLEISETGENAYTLEEIREESLILMIAGTDTSAICFTAVLKEVLGDTNRPLELE  
DILKLYLDAVVKETLRLYPPIPIFIARDSARDLALPLGVTVPVSGSDFIIGIAGIHR  
NPQYWGADAEHFKPERFLSGITPVPGAFMPSFGPRNCIGYLYAMLSIKTTLVT  
IVRRYRLLPATSFAYDKEHPLRLSFEIITKHIDNFDIQLQHRVRS

>HaCYP79

MELLLELTIEKEILKDDEIREEVDTMIAAGYETSATVLTFCMLMIGSYPEKVFG  
DDDRDLTKKDFSNIYLDVAVIKETLRFYPVAPVARYLDKDVKLRNCTLSKGA  
RCFMFIYGVHHSSIWGSDFEDFRPERWLDPSLPSPTAFVGFSAGRRNCIGK  
AYALMSLKTSLAHILRNYKLQGDHTKLELDLDIVLKPVSOGHHISIQRRK

>HaCYP80

MIENSEKTDGTQEEELREEALVLLIAGTDTTATAICFIFVLLAHHQDVQEKIY  
KELVEILGDTNKPIEIEDLVKLRMEAVIKETLRLYSPVPVTARNKSDFMLPSG  
LTPVKGCDVIIQIAGIHHNPRYWGADVEDFKPERFLKDEKPDFAFVAFSNGPRN  
CVGFCFFYNLLLRVSRGSESDRMKM

**Table S9** Amino acid sequences of olfactory receptor (OR), gustatory receptor (GR), and odorant binding protein (OBP) in *H. assimilis*.

## OR

>HaOR1

MFLMYKKKPGMDIINNIDSDYLSYNNLPQKYKLIVNKNIDNSLFYSEKCWA

LTVFIGVLIFPLMATVSTVDSFLIKGESTKYMIHDLVIPFMDPEDRFKSPIFEIMF  
AYTLYACMWYFVSFFGYDGGFFGVCINHACLKMALYCQAFDDALKEVNEKAM  
HKKIVEVIHEQNNLKRFDLIQETFNFWLGVILIATITQTDREVYTRFIDTYKIITF  
AMGVGMIYPNPKTNKRRIVCILMVLVSVMPPFALMMLIDIYNSWKRRDILNILR  
HTTIVGPFLGLFFKMFLMYKKRPGMDIINKIDSDYLSYNNLRQNYKFIVNRSI  
DNSLFYSEKCGVSVFIAVLIFPFMATVSTVDSFLIKGESTKYMIHDLVIPFMD  
PEDRFKSPIFEIMFTYTYLWYIFSLGYDGGFFGLCINHACLKMAVYCKAFE  
DALKEVNEKTMHASKIVEVIQEQNDYTRFVDLIQDTFNIWLGLIVVATMIQIGTV  
LYLISEGYGLDLRYIIFLAGTTLHIYIPCRYSAKLKYKASYIYFIISECVLLLGLL  
ALTASCEFSRDSYANLLRGMGKCNLDEYSENCSSNYDR

>HaOR2

MWLAFRKFGLDYDDFSTMIENVSIIMVLTINIYKNSTKRLEPMFESPNFEIATL  
IFMLGICFGVVTLANVLAYIIVIVGYIESQMRALSEELRNIWDDSQHFYNNVKH  
KVTDKINIMYYKEKIVDEFIKQSLRRIVKFHIANINLSHEVDQNFPSLALEFSI  
MAFAIIAELLGGLDKTYLEIPFTLSQIFMNCFIGQRLIDACCDFENSLYSFWFVI  
RCPQTGDYVSASVELSLAMCNGASILKFIYLYRKEVTNLIDQYLECHARVDI  
KSRFYESLEKYLGRGVKRRALMTWGALVLNGTIYISYGFLKPGRHLSLDLYVIY  
GLEPMFESPNFEMAVVMTISVVFVITLANYRLLITVTIGYVEAQLLASEDL  
RKLWDDSETFYENYSEKELDIKHVSPYDIKNVYIKHRLREIVKFHITGITLQHF  
VENKFRFIYVLEFLFAAIGIVTELLGGLNTYLELPYSLNQVFLDCLIGQRLIDA  
GNVFEDAIYDSQWENYNAENQRTVALMLENAQKTLTSLAGGLSPLSFMCLM  
SVIRCTYSTYTALHSTVK

>HaOR3

MEVCKIYPIKQICLMNSGREDCDIVDIYSEAVNVIKPKDRKTSIYVLPAYQH  
DLVGYCNIIINYRCPRSRDKVRVHIPFSFKAQASRRTSPLLKDYIGNNKFMKCE  
SDDQNSLDNCSPTDCDLKYQGQRPFYEMNLQTCIEAPLCFADEDKELPNVVIV  
PEINICKDLGVPLSIQDIYSLSTGLGTVTIKLTRDHVKLIVTIIRRNEMQAIFDG  
INADYDKFNNLPEDYKEIVFDTIKKTGLEKAWVIMVAITAGSYPLAGICTIY  
SSMFSDNPRRYMIELALPFLTEEEKYESPYELFAVYSIFVWVIFVGFTGYDG  
MFSVCILHVSLKIKIFSQNLKYLFDVTDLSKIKRNLAEFVKDHCEVRLIGEI  
QKCFEVLVGLIFLNAVLIQGMALIQTSSNNESDINAMYYLFALATVVHIYLPY  
LTSDVTHNAAEIANVAYSCSWELVQDKEIRKSIAIIISKAQNPFIHFRALGMLTFN  
MELFVSILQTSYSMYTLLRS

>HaOR4

MMTKTKTQGLVSDLMPNIKLMQLAGHFLFNYHSDNAGMTTLLRKVYSCVH  
AILIIVNYVCMVAVNMAKYSDEVNELTANTITVFFAHTIILIFFAITSKNFYRTL  
AVWNQSNSHPLFTESDARYHQLALTKMRRLLYFICGMTIFSVCWVTITFFGD  
SVRLMDKETNETLTPEVPRLPLKAWYPFNAMSGTMYIVAFVFQIYWLLFAM  
SIANLMDVMFCSWLIFACEQLQHLKAIMKPLMELSASLDYRPNATAELFKVSS  
SEKSEKIPDPIDMDIRGIYSTQQDFGMTLRGAGGRLQTFGQQNPNGLTQKQEM  
LARSIAIKYWVERHKKHIVRLVSSIGDTYGTALLFHMLVSTITLTLAYQATKING  
LNVYAFSTIGYLCYTLGQVFHFCIFGNRLIESSSVMEAAAYSCQWYDGSEEAK  
TFVQIVCQQCQKAMSISGAKFFTSLDLFASVLGAVVTYFMVLVQLK

>HaOR5

MPVSVDIAPRRYFYVQYILLRFLGLGWWHHPDEGNTDNFPGLYIYYAIVTEIF  
WVAGFVGLETIDPFIGEKDLDRFMFSLSFVITHDLTIKLYIFFFKNQDIQEIVRIL  
EIDLQQFYQNIENRRTIRITKILTASFIFFGWMTIGNTNVYGIVQDLRWRGEVA  
LLNGSDKIPRTLQPIYIPWKYQSDVSYISTFLLETIGLLWTGHIVMTIDTFIGS  
LLLHMSSQFAILREAITTAYDRTIIFLNNNISNDDTVIEGFTNMGLGSYYERIV  
RRYYTEEDIEKALESTLKNCFRQHQMLISCVEKFAKTYSYGFMTQLVSSMAAI  
CVVMVQISQDASSFKSIRLVTSLAFFMVMIIQLALQCFTGNELTRQAGLVSEAV  
MQCKWERMPRLRRSLIITMMRAQRPLHLTAAGFAKMDNDCFLRVSVTFHR  
KNVARILSLCTML

>HaOR6

MALRSQCGAFRKIVMHCVHGKPYLGKKWLRLTEDILRTNTSLNIRSLVSVLGP  
GVAFKANRPNYNINSERNWLSSYDHTVGYSTYSTIVKSLILLGCGELWSFFSS  
NWSLDGITDGLNVILIQFGALYKYKVVMRHKKEFREASSMESENFDLSTRR  
RKMILEVWTKRNDSTLKLMLGLGTCTVIVWHIYPLMDDLNDYLMVAIRLPFD  
YKTPPLYAVTYICTLIVFSYISYFVMANDLIVQAHLMHLLCQFAVLNDCFKNIL  
RDCQSNFKDIDTRYLHLNQNFTKVYKNRLGKLVEQHQLILNNTMKLRNLMST  
PMLIQLAVSTALICSIGFQIATSLNVNMTKGLMSLFYLGYNMFVLYILCRWCEE  
IKIQSQKIGDALYSSGWENGIVMVPGVRTSILLILARANKPTSLSAGGMYELSL  
EAYSNMVKTSYSALTVLLRLR

>HaOR7

MLFFPQPASASSVLLVHLGAVGALASGAALCGGGGTCACGALLHALHPLQLW  
TVCGLHADRAAAIAAPLHYAAIVSAKKVVICVASGWIGLAALLAPLAAAQPP  
LTYSIGLGSCAPDCGAGPGALGFCLYITLLTLLPTALVLLCSLKILRIARYHRH  
RIAAAIYEVTLAQVTVTHQRNPFSPPPPPRRRALS AVIQPLGSLAILYFPYYCV  
LMWPAIAEPPQLLAFAVLLAAAPPVNGILYGIRSRAFKDSLRYRRKRMTK  
SEVTQEIQARTPSACGSRRPSLSAGSGCIRPLTTRRLSDAAAMGSRGSRPAQR  
AASCNMLQDCQEVDTPKSRASAIPLIRAPPHVVLGRALGLEEGVNRERRRRQ  
SPRIMVTRAMSDECESPSRRPLCRQHSRSSGALLGNMTYSPALLEKVNDNKA  
DEQLLLSWPQRSQVTKNDVL

>HaOR8

MKLNKSKSTVNNEGVSSYTHFLEIPLKSVGCDWDWYEKPKKLYEIFINNIYLCV  
VLFVLLNVLLSLTVHLYTEWTDIMSSLDIADGLPLTSLVIVSYFAINKDELYS  
LTKFMNANFKWHSARGLTNMTMMNSYKTAVNFSFFYTACTLFSVTMYVLMF  
VIVHLWTKQPLQHWIYMDVTYTSYIVLIFLRQCLAQVFVALALGQLGVFFAC  
NSILLCGQLDLLCCGLRNTRYTALLKGGVDHAALFNQYKGIEEDEKHNYLYN  
KSEMIDSEYHYDDKVRNNFMGKKTQYDIYNKAYDKATSDALRECARVCQVI  
NEYKDRFEKFVSPLLVLRVVQVTLYLCTLLYAATLKFDMITVEYLGAVALDIY  
VYCHFGNQIILQADRVSTAAYQSAWPTMGVEPRLLLLNILLANLRPVVVRAG  
RFLPMNLHTFVVVCLLM

>HaOR9

MLKFLRVTEEEYEKCAKGIINPELFYKNFYLLLKWFQVLDGPIPKWTTYAKIF  
MTLCAITAQILLSLSIYHGVDNFDIPIMTEAGTYFIVMSYELLILSCTKLNIVDY  
HKLQHSCLKEDFLYVCNKGGKYREIFFYNQIETRKISMLAMIFIGNFGVCMIVTA  
VSSLLYHLATHGPNEGKRPLLFPFWAFETDFGMTPTYEIAFIFSNICVTAYAFSY

IFMVVTQIVWIREIAIKADIVKLCIQDLMNGIHPTSDKERKNYFDFLIKYRMKE  
IIQQHQSMYSLMGHYANVYKKLVLFQKVSAPVVCLSAYSATQKLETGELNAI  
LIILCIGAVTLLFIPSYLCTYLSIKVSSICYACWDIPFWNANRVIRPYLVLMQSRSL  
RPLPLIAPGFDEVSVQTFSENKMASAYSFFNMLRQANI

>HaOR10

MIQNISKSFKRLEDPKYPLLGPNTGLYWFGLWQCGNKYRDGFFNFIHFCSSL  
FVISEFVELYFMRNDLMKVLNFNISVTALSLVSISKTMFFIFYLPYWKTLIENISRE  
EISGLQDKNLKVVDIMNQYKTYSRITYSFWSVILLTNLVTILSPFLKYVTTETY  
REMIKNGTEPYQPILSSWFPFDKTKFPGYLVAVAVHIIMTTQGAGVVAVYDSNA  
VAIMSFLKGQMQLIRYKQCQLIFGDEKSIPKEDVLENIKEQYKTFNSIISPMCV  
YVLVCSIMICCSVVQLSLGEITVSQKLWVMEYTTALAVQLFLYCWSHSNEIAYE  
SLGVDQGVYSSNWWRADVQVRRQVLLLAGKLAPTIFILDAGPFAKFSMSTFID  
VSIFHNNYGLTIFEVITSYGRISRFBK

>HaOR11

MLKIFTCLEDPAHPLLGP TLWGLQKWGMWQPNKGISRIVYNVIHVLAIIFVVT  
QYIELWHIRSNLEMALRNLSVTMLSTVCVVKAGTFIIWQEPWNFIFEYISSLER  
DQLSNRSVATKKIHKYTGYSRTVTYFYWCLVTATVFTVIFAPLALYLSSFQRR  
EEIKAGTEAYPEIMSSWVPFEKTRGFGYWSLVLVHTLICFYGGGIVANYDSNA  
VVLMSFFTQGLELLKSDCERLFGDGEFICYEEAVKRIRNCHQHHVELIRYSKV  
LNSLLSPVMFLYIIICSLMICASAVQLTSDGTTRMQQVWIAEYLVALVAQLFLYC  
WHSNQVLYMSLVKVDGVSASAWWSQCVRIRRSVALLGGQLNRPIMFSAGPF  
TQLTVATFVGILKGSYSYYTLLSKK

>HaOR12

MRNYYILKGFCKRIFLVRSGNFWYEEGVMGDDNCISYKISKYILFSVYGFVTL  
LEIMAALIGDFPEDEKRDSVTFVAVSHTIVMIKIFSVISNKGLIKKLIYDLIKVCEI  
HEEEVLMKEKYRIMKINVLAYFITVYGSAACFVFEGLRKMFEGSHFVTVVTY  
YPNFEDNSVIATVVRIFTTIVLFVMMMLTMIVSVDCFTVIHII MLKYKFITLRNYF  
EKLSDGFEHEIKIKNSQISATKLTGLIEGIKMHKELLRLTKEIDKAFGTVMAL  
QLCQSSGSVSLLLQIALSDQLTFVAGMKIFFFVVALFFLLGLFLCNAGEITYQA  
SLLSDSIFYCGWHLCP SQHSQQRN LGRLVLLACAQAQRPLVMKAFKMLELTY  
GTFLILERGLLERIAA

>HaOR13

MPEKKFKSFNETFPHCAFALAIALLYPNRANLNKRKILFAIVIVVNSLILFWFLL  
YLVKCAFMLDIYNLSRNV TIGILASLFFFKTFYVHSKTDKFAELLKKITDDML  
MANDMEKEYQEIFEYYIKIGKLGQTCWIIIPILLSSQFPIYAGACMIYENLKSDV  
GKKYMVHEMELKFLEDKQYDTPYFELIFAYNLIQCVVLSLNFAGFDGSFCIAT  
NHLRLKLKLLAHKVCKAFKIAKS RHELES MVKEAIRDHQEALIFHKDLQEIYG  
GWLLMVFLLSLLISLNL FQLYLSQRIDPKYTIFAISGVIHMF TPCYFASNLMKT  
SEELSWDLYSAAWEKWADPAVTKLLIFMIAKSQQTILTGKGMVYFNMQLFIS  
VLQTSYSFFTLLSS

>HaOR14

MSFLKSITYDIVNKDLFEFNIKYLT LVGLWTNKDWSTNKLRLYKLYEVVLHILS  
FVFIIVTGIGTYQHKENIIFTSSLGKCLAAYNFVSKIFFFVMKRKQLSNLIHEIR  
SSGDEVSVGKRQLMVIHVIMITTISTVLATAFSILSLLKGEMTIEAWMPFDPMK

NRMSLLLAQILVVYFVVPVCVYRAYAIQGIVCSIVMYFCDQLVELQQRLKNLS  
YSKERERIMREEFKEIVKKHIRIMRYSNILKNIFKEFFLIQNLAVTMELCLNALM  
VTVIRLEEKTLASFLGYLGLALMNAYIFCYLGNELIIQSTGLAQAAYEASWTS  
WPVDLQKDLLLVIRVAQKPLTLSAGGITNMCIKTYSEALYNAYSIFAVLSDFVD  
>HaOR15

MSTKYFDKSIEKVQFIFLCSGTLTQSKKLTTIKKLSRIFYLINFFWLNSDVLG  
AIFWFIIEGKNGRTFVELTYVAPCITFSFMANLKAIFYLIHYEDKISDLIDKLRDLE  
ASDVIIDKSRDDIRKTDSIFLHLVLKCSNILNIVLLVTFIVSPFILIAIKYVQTNKV  
DLILPFLIVYPFDSHDIKYWPFVYVHQFWSVSIVLANICGADYFLYICCTYLRT  
QFRLQHDFTNIIKKNRHLSDFDLGRFDLEFIKLVKWHQELIRLSDILELINAKP  
TLFNFVSSSILICLTGFNVIAIENVAFAVTFVFLTASLLQIYLLCFFGDLLMKSS  
MEVSDAVYNCKWYNLNAKSRKNLIIVLTR

>HaOR16

MTDDSREESFDLDFENVFGVMTSAMRMNRSHPDIKRNIKWVFQFGVMHGVF  
SLMFGGLVYSIIFHDLKNNDYTQACANGILCVIFNVVTFSYILMLWHQNIFKD  
MIAKINRDYELAKHFTKDEQNIKTAFAGKGQRVIKLWLTVGILSAGLFPIKAIV  
LMIYYTTVSEFKYVHLFDLTYPDSVEEVKNTLGVFIVLYIYFLYCDLYSTTIYIS  
FVPLGPVFMHLACGQVELAKIRVMKVFSENLTIEEKNKRLSDIAKLLDNIYSFV  
DKIKTSFKMLYELTLKGTIVIIPIISLFQILEGEELHFAVYSCNWEKQWNKKNRSL  
VILLQRTSQPVAIRTLFRDLCLDALTDVRQ

>HaOR17

MNYYFGLLRSAAWRCVAAHTTLLQGAGYMRWRGADKSTSRVHFIYRKIVFAI  
TSLYLLQECIYAYRERNDMTKLSKVMFLLLCHITSIAKQLLKCYVSFQDPIYNA  
ANPKAQTLQSTSRGARLLLSAYTGCAVLTCTLWLVSIMHRVDGHYVEFPF  
WTGFNTDPPIVFVVVLIYSFYVTTLVGIANTTMDALMATILYQCKTQMRILRN  
DFENLPERAKVICNETGEGYERVLMLLVGRGFQHYRRVIGTAKSLQDIFGVAI  
LVQFGIGGWILCIAAYKLVSSERIVCSVYSMQWLKTPPHFKRTLVLMLMQFVRR  
PLRPAVGRIIPLSLDTFVKILKSSYTFYAVLRQTK

>HaOR18

MRILKSEDLYLNRAKFVMKYLGWVWPRINENKIHKSYSRMFMMSLQYLFLIFQ  
IVYIVQVWGDLEAVSQSSYLLFTQACLCFKVTVFQVNIDKLKDLLKRMNDGIF  
LPQSTEHERILKNQAKRIKRLLLAFMISSQTTTCGLWALKPLFDDAGSRKFPPD  
MWMPVRPELSPQYELGYAFQLLTICMSAYMYFGVDSVVLMSVIFACAQLEIHK  
DKIMNSRNDNETIDRKNILTENNKNLIECIKQHQAISENLHTVLYNCAWYEQ  
DANFKRMICFAMMRMSRPIVLRAGHYISLSRQTFVSILRMSYSYFAVLNQTNL  
N

>HaOR19

MIFLENLAAAFGNFPKVEKNSAIMFSAIHNIILVKMFLLFYKSSIKRINYEMA  
SLMKDIEDGDTMIMQKKKVLWGIVFYAITVYLSLIAYGVESLRKFLVEGTPFY  
TVVTYLPDYYDVSLVASGFRVFFYLTWLYMMLPMMAADCMPIIHLIIAYKFIT  
LCKHFETIKMEFDRNLLIMSNKKATELLKTGCIKGIIHQKLIFLAEIQRIFGVI  
MSLQVCESSAVAVLLLLRLAASLLANSIFFCGWHLCAMDKQSHKDIRRIVLVG  
CAQAQKPLILKSFGVQDLSYSTFVSVARMTYSVFAVFYQRRD

>HaOR20

MDESSRNKAKLEINESLTLSIFSMRRIGLSFDKPKTSSAYFRQKILFVVSVCIGIC  
CHVFSEFINIILTFASSPRVEDVVPLFHTFGYGALSIAKVFLWYKNTVFGELID  
ELAGIWPMPLQEDALVIKEKSLTALRISHRWYFCVNVMGVWVFNLTPIIIYFY  
RIWQGRDAEIGYVWESWYPFDKHQPIAHVAVYLFEMFGGVTCVWIMVSSDL  
LFSGMASHIALLLRILQRRLETLGTPEQSDEENYEEIRSNIKLHQRLIRSQKPIAF  
TAMKFTNISLVTYSSILTRSYSYFALLYTMYNDS

>HaOR21

MTNLDKYLECDARVDAESRFAKNLKKKLKMKRRAMLTWGALALNGVVY  
ITLPFLKPGRHLTEDLYVTYGLEPMFESPNFEIATVLMTLAVVFGVFTLANYRL  
LITVTIGYVEAQLLALSDDLQKLWEDSETFYEFKFSKKELDIKHVSPYDIKNVY  
IKHRLREIVKFHITGITLQHFVENKFRFIYVIEFLFAALGIVTELLGGLENTYLEL  
PYSLNQVFLDCLIGQRLIDAGNVFENAIYDSQWENYNNAKNQRTVALMLQNAQ  
KTLTSLAGGLSPLSFMCLMSVIRCTYSTYTALHSTVK

>HaOR22

MDIINEIDNDYSSYNNLPQDYKLIVNKHIDNSLLYSEKSWAITVFITVMIFPFMA  
TVSNVKSVLFDSEPTRYMIHDLVIPYTDPEDRFKSPIFEIVFMYMLYACFWYVL  
NFLGYDGGFFGLCINHACLKMALYCKAFDEALKEVNEKAIHKKKIVEVIQEQNN  
FKRFMDMIQDTFNIWLGLILVATLTQMGTVMYLISEGYGLDLRYIIFLAGTTLH  
IYVPCRYSAKLKHKVGNAPACPLVLQMFLGGDDRLLTSVSRDSYAYLLRGMGK  
RNFEEYQENCTNYDR

>HaOR23

MATTYSTAFMFTVCTALISYGFDGLVEVIHADGTFTTVITAWPSPLDKSVLANF  
VRIINFLVWWAFVIRVSATYVVIITVATALSHQYKNLQSYFYKLNDLFEDAVDD  
RTQNEINEIKYMKALEVGIKLHSDTLWCKTQFQEICSPVFSGSIMINIFVLCMLM  
LQMVNSERTLLNGISTLTTSAAVLLSTGCIMWNAGDVTVEAAVLPSAMYSSG  
WENCQDKVSRIRNLLVAMQQGQKEVIIRGFGIFEISYQSHLAIVKSSYSTFS  
LLY

>HaOR24

MSRLLMIYHAAVGICGVLFTAYPIINKALGDEVYLTGYIPFDTNASPVFEVAAT  
YMGILITLQAYGHVTMDCTIVAFYAYAKVQLQILRYNLEHLVDETEVRRPRLK  
YVDHDAEAKNILHERFVNCIKHYEQIVWYAKEIECIFSEAMVLQLFVVAWVIC  
MTMYKIVGLPLFSAEFISMAMYLGCMLAQLFIYCYYGTYLKFESDLINESIYK  
SNWLLMSPGFRRHLIVLMERGRRTIEPCTARVIPLSLDTYISVLRSSYALFTILD  
RK

>HaOR25

MTSTVRNFLTKLEDPERPFLGPNVKWLELWGLLLPKTKLKKFMYMMIHTLM  
FIFILTEFVEIYLRSDVTVILQNVKYAMVSVVNFNKKVVTFIVWQKYWKSIDF  
VTVTDMERRKSQDKTYQDIKKFTRYCRSITYWYWFLTYCTVVMTISQPLVK  
YLIIYNGNDSDTIPEIVNSWLPVDKHTLPGYLLMSYQIYAAFYSGGWMTSF  
DTNAFSIMIFFQCEIELLRKDGGQFLGTLDNPRSKEEAKMRFAFCSKRHNDLLR

>HaOR26

MTGTAFLFLTNSHATKILNILARRDDIQAIIDNADLVLRASRDEGRDIVKRYP  
YDTSKSPAYELTYIHQVIAISVAAFLNLNKDTLVTTLIAQCRCRLRLVGLALRN  
LCNDSYSIGDTSANIDLTPSPKTLILTPAQEEQVRIRLRGCVQQHQKALAAVH

LQKCFSEPTFAQFTVSLVIICVTAFQLVSSSEDVAGAAAYDFPWWYACSVRIRKSILIL  
MRRRCRRTTKLTAGGFTTSLASFMAIKTSYSMFTLLQQVNERN

>HaOR27

MYRKLASAMESPYFDNSTPKRKALVKFWSQRNERFLKLLLILGSCTLGAWHI  
YPMVDDIDYNLMVSARFPFDYKTPNRFPIFYIIVLVVFNYGSLVMINDLMMQ  
AHLMYLLCQYTVLANCFEDIINDCLGDENKLNKHLIMTEQFKRRYLERLNG  
LVEQHKFILNNTMELKQSLSPMLAQLAASAMLICFVGYSQASRSENIGNSVY  
CSGWERGLTAIPGVSASLLIVAIRARKPIVLTAGGLFDLSLASYTTVIMYL

>HaOR28

MYTYFKIVVFWLNKKKILNLLKFLHCDEFKPEEREHIEILRKSIIKTSRFVMTYY  
STMFGIVLPLTENFEILPTNVEYPYFDVYTNPTYAIVYLHHVLGQIEILAYNLRN  
FENMAERKRKRDLRKNHGIEDPRSHPIQIIWMAIYLTCLMIEVFILCWFGNELI  
LKSLELRRAAFEGPWLTDPKTTMFIVIFLERCQRPLRVTAGKIFTLSLDTYTY  
LINWSYKAFVMRNTKK

>HaOR29

MKADDFTTPYGLEPLTNAPKREICLLILFTQECTIMTVVLNYQALLFLIAHTA  
AMYEMLSTEMLAFDKYEDTSESKLLVKRRLPLLIRRHITLNLNIIKNLKALYSM  
PIGVNFGSNAVCMCLFFYLPLRECVTFSPVLIYCFVFFLYCFLCQRLINASEFF  
ENAVYSCGWEKFDVKEQKTVYVMLLQAQQPITLLAADIPVNIYTFATTLQAI  
FKFITVVKF

>HaOR30

MTLVVFNVWGHKLILRYHLEHFPKHESVNPVAVYNEKVLLLLKENIEHHKLIT  
EFMSLASEAFGPVMCFYYLFNQVSGCILLLEISTLEMAAFASYGTLTFIVFQQLI  
QISVIFELIGSQSEKLKDAVYNLHWEHMNQKNKTIVLFFLYKSQTPITLKAMG  
MVPVGVQTMSSAIKTSFSYFLMLRTVAEN

>HaOR31

MNTKLSYRSVPHLFRRLRSGYYQIDPKSPKIKRILHSIYMRFTLIWIVVYTTQ  
QAIKLFVQDDIDKVMATLFLFLTHTDISIYQMILWIKSDEIEELLDIMRGPLY  
NQEDSDHMEYLTDVARYALLILRIDNILALFTCFLWVILPFVLHLQGKPVFAI  
WLPFDVNFEP

>HaOR32

MNENFLKPYSFICVLDFTTVDALYYIMTTHICSHFTILSNEIQHLDEKTSYRLK  
DIVKKHQYILKLSQDLEEFCVFNLFNVLVGSLEICALGFTLTMGELAQIPGVV  
LFLLSVFIQILMISVFGEHLIQESRKIGEAAFKSKWYNMDQKSKKTILLMLR

>HaOR33

MYHKEKIVNEFTKQRLKHIVKFHIANINLSHEVDQNFRPSLALEFSIMAFIIAE  
LLGGLDKTYLQFPFTLVQIFMNCFIGQRLIDACDDFENALYSCKWENFNTTNQ  
KTVYLMLIMSQKTLTSLAGGVTKLDFNCLMNVLKSAFSVYTTLSALK

**OBP**

>HaOBP1

MTKSIVEMSLNKTIAALFLIFTSYCYALTCHSQRGGKENEKRVINTCLRQMEN  
NNSRNSNEDWSDWDNYNQRNQRERDNRHENRENKMGNRDIEKGERDRNK  
NKRGDGANERHNRQQNRDGVNENISNRMDDGYNSMGARNVNVNMNGPDSG  
SGRSRNDMTKNYGKNDQINGRDEFFQSEFDGDNPTVQQYNYHPSPQPSRRY

RREKRVEMNSGQRSQYNPHSQKSNSHEGNNEKRNSSNSSSSNDADRACVLHC  
FMEKLGHTGDSGMPDRYLVTHAFTKDEKDEDLRDFIQESIEECFQILNNENTD  
DKCEFSKNLLTCLLEKGRANCDDWNESTSLLE

>HaOBP2

MQCSDMSDLLEFNETTFSSVSSRLPARGSMLVQVVLATLLALGAAPCVLQRA  
CPPRAPRPPSSVCMHRLHPDDNVVVAPPQQDARAHKARRGAERARVLLPALL  
RLSLAAVLYLLPLRVSQGGEMIAIFVFMFFGIREIAADCKNCGMLGKDEKAM  
FRAHSEACRSHSQVDPKLIESLLNGELVDDPGLRKHVYCVLLKCKVISKDGKL  
QKAAVLGKMAARGDGKNVTKVLENCANQPGESPEDLAWNLFRCGYDKKAV  
LFGHTRAAPAGNDA

>HaOBP3

MNSNCFILIACAIFSVCNSSYVDKLLKCSVNDEECFKKLLNKFLEDNSDNGIPE  
INIPPLDPFELKNVVVTVPDLINATFIDGTVSGAKKCVINSFKIQSDKGFTKVGL  
TCDLVLGKGTYSLEGTGPLLKNLLGGDFLRGSGNMELKLNKIKMNLGVVYHFI  
KKDDGEVYYKCHRDKFQYDCDVGNAHLTSEKIFLGKEDATELVVGFFNQNW  
KMLEKSFGKHLFDLTALNIFNDVLQKFLESTSVKHFIIEDLSNLVKN

>HaOBP4

MYKSNLSYLFLVPSLPKCHVHDEDCCLKSLAQKAITDISNIGVPEMGIRPIDPFQ  
LSNVTVSIFDIINITLVDGEAKGIKDCVVDLSVSQVEEGKTKVAYTCDLIIEGKF  
NLQAASPLFQNLGGEKIHGNGNAKVELDKVHMSLEFSFHYIRKEDGNIYTK  
FHPEEYDYDSIGDMRISADNIFLGDKDVSKMIVVWLNENWKYAMQTFGRSF  
VDVAMGLFYDILQQIFYATPTKSYIIEDLSSLVKHEE

>HaOBP5

MHYTLINSPANGRLHAQQLARCLES DP SLTD PSSGPGYRRELYCFIKDFHLPEA  
RKAIAAFIADCVKESGAKIEILAEARKGKFANDEGLKEFTLCFFNKAGILTPD  
AELKVDVALAMLPA GVDKNVPLSGKQKEKAKIYIEQCAKESGATSEILSEAKK  
GKFADDEGLKKFILCFFQKAGIISPEGELNVDVALTKLPVGIEKDFTGKILNECK  
NRKGSTKADTAFEMYKCYYYNSKQRILYD

>HaOBP6

MARVIVIFFLLPTLAICFREGNIHLLLEEIQAAALNSCTQTNHSKNQNDNGKRQK  
RFDNSYPITRIDANPKEEVNPYNHIRRNTSLIDQMNVNLNGTDYDYPGYRAGT  
GGEKYVKSIPRALGKDIKNSINYNVNDRIKRNEPLINNHDNDQCLSQC VFA  
NLHVVDVTQGIPEPELWNRIRTSVTSLSQSRVLLRDQIRACFQELQSESEDNGCS  
YSNKLERCLMLRFSDRKINGTQTATS

>HaOBP7

MMRKTCPKNNVEDDKIDQLIKGVFIEEKEVMCYIACIMKMANAIKNGKLN  
YEAAMKQADLLLPEEIKEPAKEAITAERSDADVKKWFIQQALECTKEHPLTGE  
EIQMLKEHKIPDQMSAKCLVACLFKRIDWIDDKGTFNKENAYKLSEREYPGET  
EKLENAKKLYELCSKVNEEKITGDNEVCERSVLIAACLTQHANTMGFLI

>HaOBP8

MYRAIVFLFAIIVACQANVAVTPPIKCGPLPNMVLWCIDTPTVIKAEVATRCSSA  
VSECEKTTCTFRESGWLDGDKLNKEKLSAHFDKVGEDHPEWQAAVESLKTS  
CLRINLPAQGVYLNCPAYDAAFCIYTSFIKNAQSSVWKTSPRCDYPRQFAAAC  
PVCPEDCFAPLVPIGSCNACLTLP RSP

>HaOBP9

MFRKVSALLCLCVFSISLSDSAISAESETRCRNPPTAPQKIERVISLCQDEIKVSI  
LREALDVIKEEHTMPAERRRNKREVPFTHDEKRIAGCLLCQCVYRKVKAVDGY  
GFPTLEGLVGLYSDGVNERGYFMAVLEASRECLMRNHDNFSRSPMDNGRN  
CDVSFNIFECISDRIGEYCGNSGL

>HaOBP10

MGVSRDGRQQGSARRWLVALLACNVMVVRGNVDVMKDVTLGFGGEALQHC  
REESQLSEDKMEEFYYFWNDDFKFEDRELGCAIKCMGNYFNLLTDSHRMHH  
ENTDKFIKSFPNGEVLSKLMVELIHKCEQKHDSEPDHCWRILRIAECFKASCQ  
TEGIAPSIEMLMMAEFIMESEAM

>HaOBP11

MLRIVSCLFIVLQVVSSQPPPQCRRPPPGIKNPGECKIEPIFKEEDFKDCGIEKP  
DDAKNFKPGPPDCSNSICLLKKYNLMKDDSDLDTDEAAKFLDKWVESNKDF  
KDTVDAKDKCLKDDLPGPPEICTPQKVVFCAHTIFTECPKWEDTDNCKKL  
KDHIIECKSYFP

>HaOBP12

MASFSYLIVFVVVLAAPRSVKSTAEVMSHVTAHFGKSLEECCREESGLTPEVL  
QEFQNFWSDEFVVHRELGCALICMSNKFSLMEDDARMHHVNMHDYVKSFP  
QGELLSAKMVELIHNCEKQYDDITDDCSRNVKVAACFKENCKKEGIAPEVAM  
IEAVLEQY

>HaOBP13

MKIQLAYAVIYLAISVNSYKHKFFSQNLDSPELSIQYARDKRSDVITNECLME  
MYPRNLYKYPLHIDRNDIPCIHCVLKKFGIMTNDGIINIRNYRVRQAIRYDP  
RILISDVGETCAQNINGMNLHDVCKKAKVFNDCTQLYVISFRDTDE

>HaOBP14

MTSFSVLVFLVAAAINLGTVHAISDEERNNIHLELLPILAECSKEYGVTDEEIKT  
AKESGAIDGINPCLMACVFKKMNMVNVKGLFDVDKAEITKKFLPNGDDQN  
KATDIKSCASVNDKDVSDEGDCDRAKLLFECFIPFKGEFIKSS

>HaOBP15

MLKLFLTLLLYGVILNFRVSADSTEDLKQKYVEMIMGCAKDYPVTADDIKQL  
KNKQMPDSAKCLFACAYKTSGMMDDEGNLSVEGVNEIAKKYLSDDPERLQK  
AKDFTDVCKEVNDIKVSDGTGKCERAAALIFKCTIEKAPQFDFDV

>HaOBP16

MMNTEALSTTESAFSMEENNKTDLDIMAIMLDCNDTFRVEMPYLDLNLKSGS  
FPDETDRTPKCFIRCVLEKSEAASEDGQFNVTRTAELFTQIRNVPQEDLTEMAT  
PCSERSECKCERSYQYLCIMENVINKYDTP

>HaOBP17

MDTFAMTVDQKAMIIHKHFEELGIECIKDNIMTNDDIRDLRSRKLPTGENVPCF  
LACMFKKLGIMDETCFLQKETALDLAKKVFNDEDELKLIEDYLHSCSYNSES  
VGDGDKGCERAMMAYKCMVENAEQFGLDI

>HaOBP18

MEGYLALCSVLICLIGKTRALDGEMAELAKMLRDSCADETGVDGTGLIDKVN  
AGADLMGDAKLKCYIKCVMETAGMMSEGQVDVEAVIAVLPEELQKHADNM  
RACGTQKGSDDCDTAFLTQSCWQKANKADYILI

>HaOBP19

MKTILVLAICFVAAQALTDEQKDKLKKHRSECLAESKADEQLVNKLKTGDFK  
TENEPLKKYALCMLIKSELMTKDGKFKKDVALAKVPNAADKPAVEKLIDTCL  
ANKGNTPHQTAWNYSKCYHEKDPKHSIFQ

>HaOBP20

MECGKDHPVPVADMLELHKLVPKKREVKCLLACTYKKLGTMNAKGLYDL  
EAGYKIAEKARNGPGDDKRVENGKKIADICNKVNDEPVTGDGEEGCDRAALVF  
KCFVDNAFKLGFKLQM

**GR**

>HaGR1

METNSLNTRTHGFNKRNEVRKRIMFEQGDGKDMKGYEAKDVYGPQITENDG  
ELLDKHDSFYLTTKSLLVLFQIMGVMPIMRVPRDAKTTKRTTFNWISKATLWA  
YLVWSFESIIIVIKVGRERLANFQQNSNKRFDDEVINYIIFLSILIPHFLPIASWRH  
GPEVAIFKNMWTHYQLKYLKITGTPIVFPNLYSLTWGLCIFSWALSFVILSQN  
YLQDDFELWQSFAYYHIIAMLDGFCSLWYINCNAFGTASRGLATNLHKALQA  
ENPALKLAQYRHLWVDLSHMMQQQLGRAYSNMYGIYCMVIFTTTISLYGALS  
EILERGLSYKEMGLFVIVGYCMTLLFIICNEAYHATRKGLEFQVRLLNVNLG  
GIDRSTQREVEMFLVAIAKNPPIMNLDGFTNINRELFTANISFMSTYLIVLMQFK  
LTLLRQGTKVLKKISRIFNITTAATDDVEYEE

>HaGR2

MIPDHLFEEGINNSLFRNEMKHVQLSKVVYEKTQKDYEREQRNLLSSQDGD  
CEIHDQFYRDHKLLLVLFRALAVMPITRSRPGTITFSWRSRATIYAIFFYIVATVI  
VLIVGYERITILRSTKKFDDYIYSILFVAFVLPFWIPFVGWGVVAHQVAIYKTN  
WGKFQVRYRVTGENLKFPNLKTTIVISVGCLLLAICFLLSLCALLDGFLLRH  
TIAYYHVITMINMNCALWYINCKGIKIASQSLSECFRRDVHLECTSSLISSYRFL  
WLNLSELLQSLGNAYARTYSTYCLFMFFNITIAVYGALSEIVDHGFGFSFKEM  
GLIVDALYCCTLLFIFADCSHKSTLKVAAAGVQDTLLSIDILSVDRPTQKEIDHFI  
QAIEMNPAVVSLKGYAYVNRELLTSAISMIAIYLIVLLQFKISLPKDLST

>HaGR3

MGVLPLTRSSSGLNQFHIAFPSMLYSVICYVCLVGYVIYLSIDNVQILRTAEGKF  
EEAVIEYLFTVYLFPM LVVPIMWYETRKIAGILNGWVDFEICYKKLSGRILPVK  
LYKKALAI VVIPMLSTSSVIITHVTMVHFKLMQILPYIFLEILTYILGGYWYLL  
CEILSVCASIVAEDFQQALRHVGPAGKVAEYRALWLRLSKLARDTGIANCYTF  
TFVNLYLFLIITLSIYGLLSQISEGFGTKDIGLAVTACCSILLFFICDEAHYASHN  
VRTNFQKKLLMVELSWMNTDAQTEVNMFLRATMNPQSISLGGFFDVNRHL  
FKSLLATMVTYLVVLLQFQISIPDDSQREMDTDENQKQLNDTTVTEATTITSTL  
ATTIMTTLAKRKKKQ

>HaGR4

MPGSENVKTRQDECRVQGPLALALRVLRILGAAPLNMTRIGQTYVVTVSKKA  
AIYGCILTLMTLWIEIMLAVFYIEIYKMSLLELENALFLFEIVQSLKAMREKFHL  
LVDV VNSDSIKVDVALSTYKSVTTFTISYLSICELVREVNLRSGFYMYLLFSSSI  
YLMLTVCNLLDSLHLYSMSYPGRFLLTSVCLQTMWILWHLKNAVQFVEPCHK  
ITHEVNII RCLLAKLMYNMTPVGKRVSELDLMFKQLTLNEPTLTPFRMFAVQ  
RSLTTTVFTSIICPIFFIVSFLASLGMLIP

>HaGR5

MMTLNRFTFGPHAEVHDKEAVLCSETLTGYDLAVGYFADVVSPEQDHVAKV  
LFAKKDGEESDKLTSLSKEVTLDVTSLHKLYDLLHQCSEQVNSVMSLSMIVM  
LLTSGLSTILLKNTIVVIKNISDMYNPSKVRSLIAYVFGRSLKYIILLAVPCYIA  
NNTKGHVITIRSMIHDSLNGIQLGQPLCGINFRRRSFRTDTTWEPSREEPILSLK  
VGNAPACLLVLQMFMSGGDHLTSDPTMVFRKKSVPPLTMELAL

>HaGR6

MKLTIIVGQIFGLNPVIGVTDVDSSKLRLKGYEHAVYFTYSFAFLVLRSLAVSL  
VASQVHTASRQPVYALYDVPSAVYCIEVQRFIEQIHGETVALTGLQFFKIKRRIV  
LAMAGTIVTYELVLLQFTGITPTVAPLHDDIEYKA
